# Supplementary material for: Sequential ligand- and structure-based virtual screening approach for the identification of potential G protein-coupled estrogen receptor-1 (GPER-1) modulators
Source: Royal Society of Chemistry journal article supplement (doi:10.1039/c8ra09318k), 2019-01-01

## Supporting Information\_1

### **Sequential ligand- and structure-based virtual screening approach for the identification of potential G protein-coupled estrogen receptor-1 (GPER-1) modulators**

Shafi Ullah Khan<sup>a</sup>, Nafees Ahemad<sup>a,b</sup>, Lay-Hong Chuah<sup>a,c</sup>, Rakesh Naidu<sup>d</sup>, Thet Thet Htar<sup>a\*</sup>

<sup>a</sup>School of Pharmacy, Monash University Malaysia, Jalan Lagoon Selatan, Bandar Sunway, 47500 Subang Jaya, Selangor, Malaysia

<sup>b</sup>Tropical Medicine and Biology Multidisciplinary Platform, Monash University Malaysia, Jalan Lagoon Selatan, Bandar Sunway, 47500 Subang Jaya, Selangor, Malaysia

<sup>c</sup>Advanced Engineering Platform, Monash University Malaysia, Jalan Lagoon Selatan, Bandar Sunway, 47500 Subang Jaya, Selangor, Malaysia

<sup>d</sup>Jeffrey Cheah School of Medicine and Health Sciences, Monash University Malaysia, Jalan Lagoon Selatan, Bandar Sunway, 47500 Subang Jaya, Selangor, Malaysia

\*Corresponding author: [thet.thet.htar@monash.edu](mailto:thet.thet.htar@monash.edu) (Thet Thet Htar)

### **List of Content**

**S1:** Table of enrichment factor (EF) 0.5%, 1% and 2% and the area under ROC curves (AUC) of the 3D virtual screening protocols for the selection of query model

**S2:** <sup>1</sup>H NMR Spectra of Compounds SK0

**S3:** <sup>13</sup>C NMR Spectra of Compounds SK0

**S4:** <sup>1</sup>H NMR Spectra of Compounds SK0P

**S5:** <sup>13</sup>C NMR Spectra of Compounds SK0P

**S1: Table 1.** The enrichment factor (EF) 0.5%, 1% and 2% and the area under ROC curves (AUC) of the 3D virtual screening protocols for the selection of query model

| Statistical Matrices                                                                                              | G1_conformer#1 | G1_conformer#2 | G1_conformer#3 | G1_conformer#4 |
|-------------------------------------------------------------------------------------------------------------------|----------------|----------------|----------------|----------------|
| ROCS_TanimotoColour                                                                                               |                |                |                |                |
| AUC                                                                                                               | 0.754          | 0.749          | 0.746          | 0.732          |
| 0.5% Enrichment                                                                                                   | 42.6           | 43.1           | 43.6           | 43.6           |
| 1.0% Enrichment                                                                                                   | 21.3           | 21.6           | 21.9           | 21.8           |
| 2.0% Enrichment                                                                                                   | 10.7           | 10.8           | 12.3           | 11.3           |
| ROCS_ShapeTanimoto                                                                                                |                |                |                |                |
| AUC                                                                                                               | 0.767          | 0.7311         | 0.731          | 0.757          |
| 0.5% Enrichment                                                                                                   | 52.2           | 52.7           | 42.6           | 44.4           |
| 1.0% Enrichment                                                                                                   | 28.4           | 28.0           | 22.5           | 25.3           |
| 2.0% Enrichment                                                                                                   | 16.3           | 14.1           | 14.4           | 18.1           |
| ROC_TanimotoCombo                                                                                                 |                |                |                |                |
| AUC                                                                                                               | 0.797          | 0.766          | 0.777          | 0.798          |
| 0.5% Enrichment                                                                                                   | 56.1           | 58.9           | 48.5           | 49.9           |
| 1.0% Enrichment                                                                                                   | 28.2           | 29.6           | 28.3           | 29.9           |
| 2.0% Enrichment                                                                                                   | 15.6           | 16.5           | 17.0           | 17.3           |
| Electrostatics Potential Similarity Virtual Screening                                                             |                |                |                |                |
| AUC                                                                                                               |                | 0.649          |                |                |
| 0.5% Enrichment                                                                                                   |                | 35.7           |                |                |
| 1.0% Enrichment                                                                                                   |                | 21.4           |                |                |
| 2.0% Enrichment                                                                                                   |                | 10.7           |                |                |
| Structure Based Virtual Screening Using Homology Model of GPER-1and Diverse Dataset of Active and Decoy GPER-1    |                |                |                |                |
| AUC                                                                                                               |                | 0.546          |                |                |
| 0.5% Enrichment                                                                                                   |                | 10.0           |                |                |
| 1.0% Enrichment                                                                                                   |                | 6.7            |                |                |
| 2.0% Enrichment                                                                                                   |                | 3.3            |                |                |
| Structure Based Virtual Screening Using Homology Model of GPER-1 and selective Dataset of Active and Decoy GPER-1 |                |                |                |                |
| AUC                                                                                                               |                | 0.660          |                |                |
| 0.5% Enrichment                                                                                                   |                | 14.0           |                |                |
| 1.0% Enrichment                                                                                                   |                | 7.6            |                |                |
| 2.0% Enrichment                                                                                                   |                | 5.6            |                |                |

## S2: <sup>1</sup>H NMR Spectra of Compound SK0

SK0

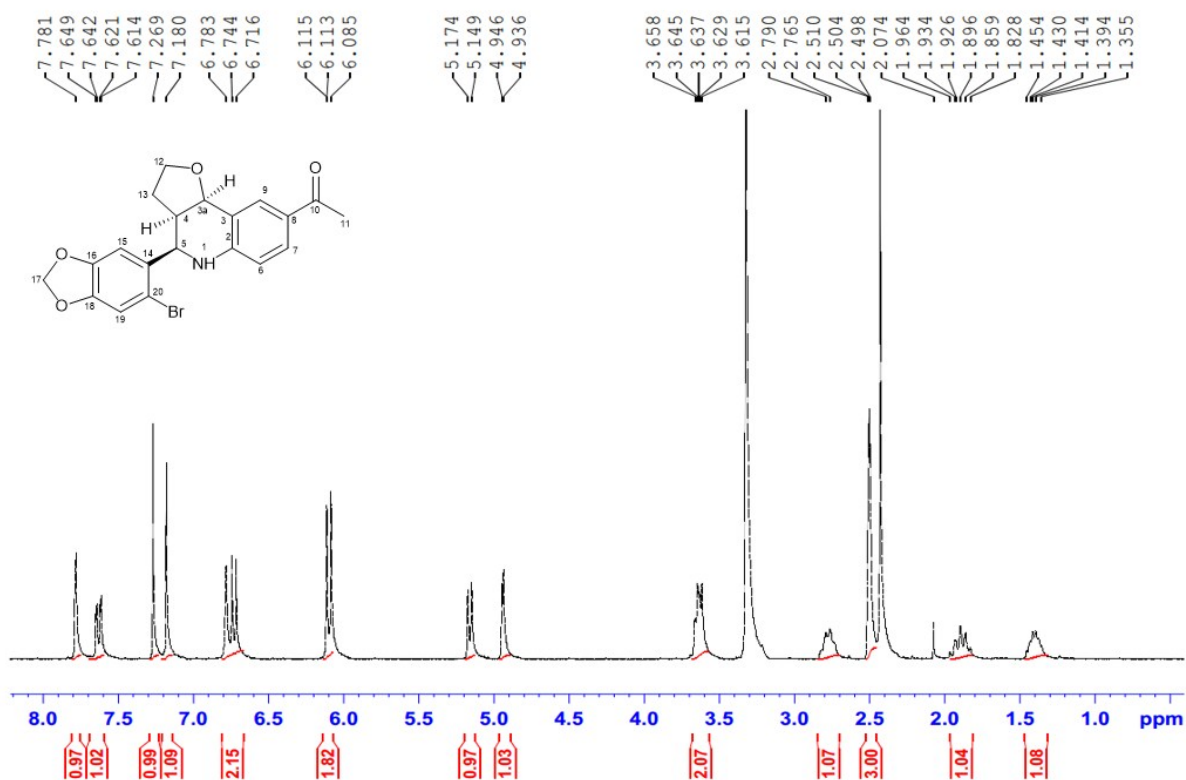

### S3: $^{13}\text{C}$ NMR Spectra of Compound SK0

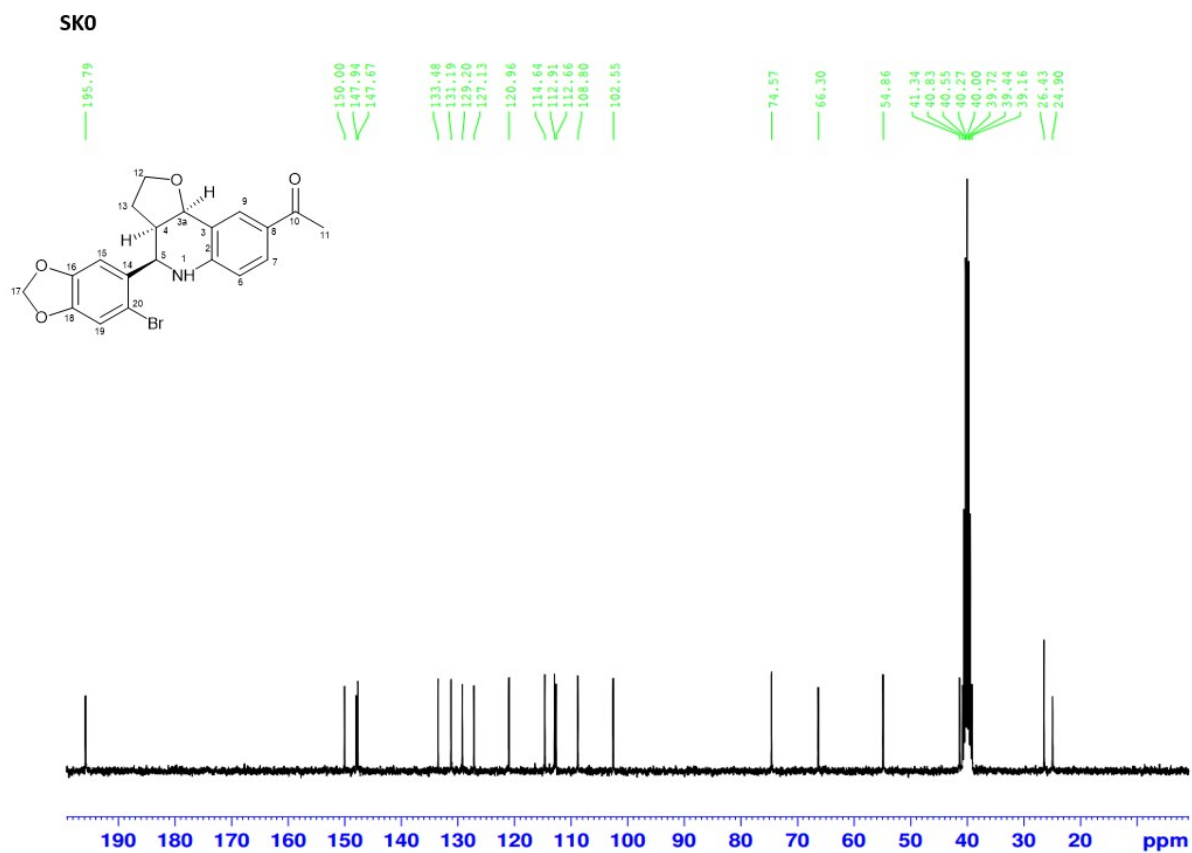

# S4: <sup>1</sup>H NMR Spectra of Compound SK0P

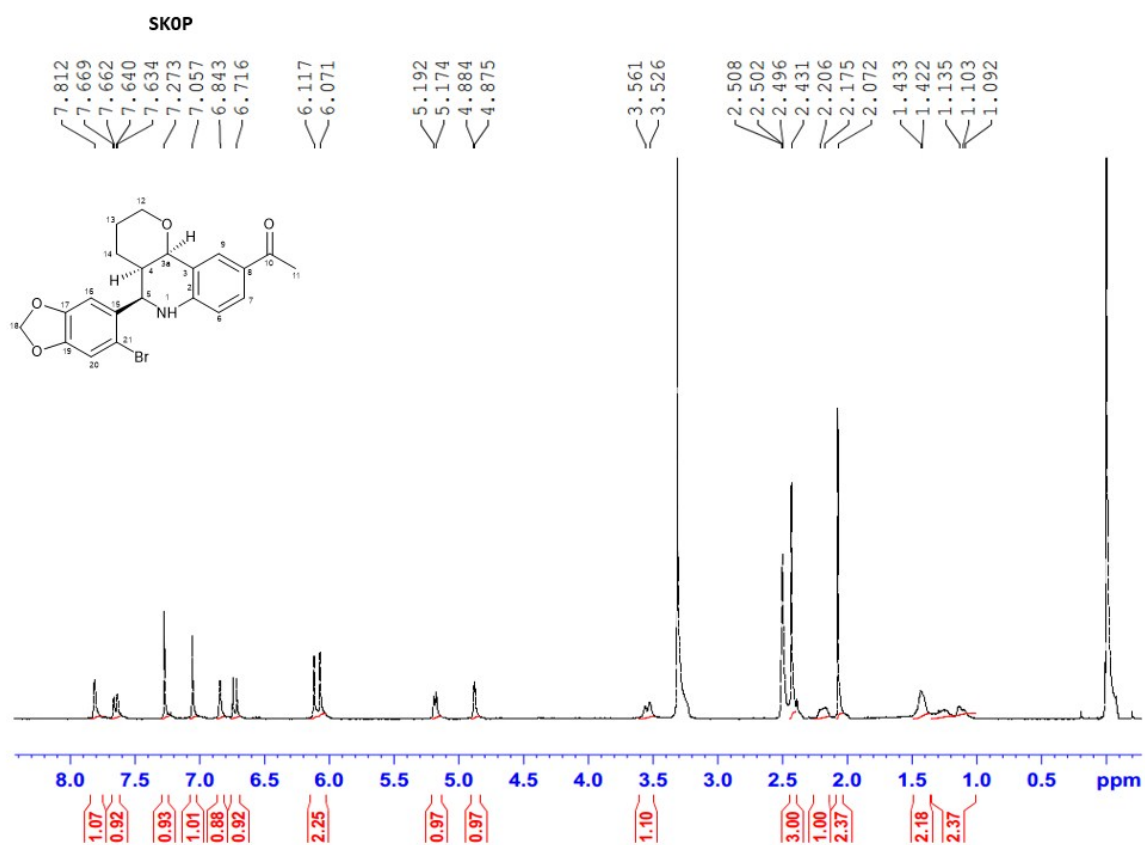

## S5: $^{13}\text{C}$ NMR Spectra of Compound SK0P

SK0P

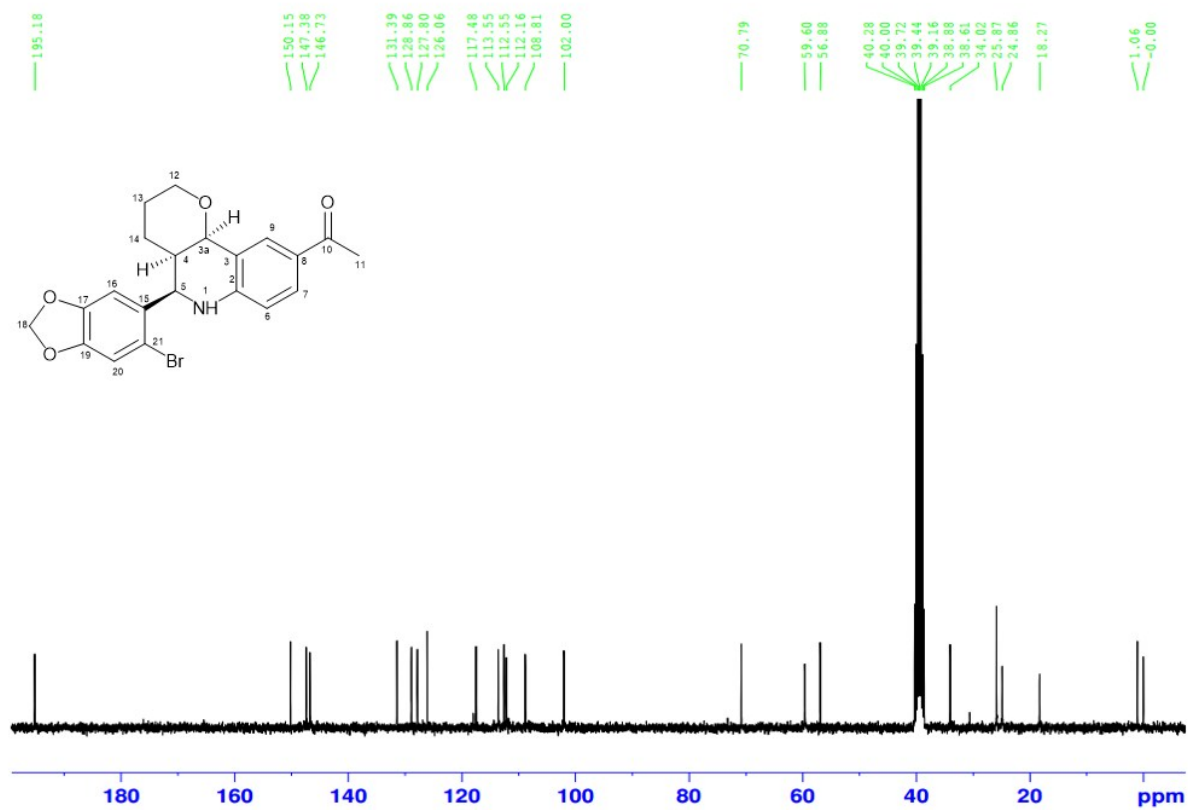

Supplement: c8ra09318k1.pdf [file c8ra09318k1.pdf]
