# Supplementary material for: Sequential ligand- and structure-based virtual screening approach for the identification of potential G protein-coupled estrogen receptor-1 (GPER-1) modulators
Source: Royal Society of Chemistry journal article supplement (doi:10.1039/c8ra09318k), 2019-01-01
Supplement: c8ra09318k2.xlsx [file c8ra09318k2.xlsx]

## Sheet: Contents
Supporting Information_2
Sequential ligand- and structure-based virtual screening approach for the identification of potential G protein-coupled estrogen receptor-1 (GPER-1) modulators
Shafi Ullah Khana, Nafees Ahemada,b, Lay-Hong Chuaha,c, Rakesh Naidud, Thet Thet Htara *
aSchool of Pharmacy, Monash University Malaysia, Jalan Lagoon Selatan, Bandar Sunway, 47500 Subang Jaya, Selangor, Malaysia
bTropical Medicine and Biology Multidisciplinary Platform, Monash University Malaysia, Jalan Lagoon Selatan, Bandar Sunway, 47500 Subang Jaya, Selangor, Malaysia
cAdvanced Engineering Platform, Monash University Malaysia, Jalan Lagoon Selatan, Bandar Sunway, 47500 Subang Jaya, Selangor, Malaysia
dJeffrey Cheah School of Medicine and Health Sciences, Monash University Malaysia, Jalan Lagoon Selatan, Bandar Sunway, 47500 Subang Jaya, Selangor, Malaysia
*Corresponding author: thet.thet.htar@monash.edu (Thet Thet Htar)
*Corresponding author: thet.thet.htar@monash.edu (Thet Thet Htar)
Please Refere to Refer to respective Sheet for each Datasets
Sheet 1: Contents
Sheet 2: Active GPER-1
Sheet 3:Decoys GPER-1
Sheet 4: Active GPER-1_Selctive
Sheet 5: Decoys GPER-1_Selctive

## Sheet: Active GPER-1
	Active GPER-1
Compound No.	Compound Code	SMILES
1	GPER_G1	CC(=O)c1ccc2N[C@H]([C@H]3CC=C[C@H]3c2c1)c4cc5OCOc5cc4Br
2	GPER_G15	Brc1cc2OCOc2cc1[C@@H]3Nc4ccccc4[C@@H]5C=CC[C@H]35
3	GPER_G36	CC(C)c1ccc2N[C@H]([C@H]3CC=C[C@H]3c2c1)c4cc5OCOc5cc4Br
4	GPER_GPERL2	S=C1NCCN1C(Sc2ccccc2)Sc3ccccc3
5	GPER_PBX1	O=C1Oc2cc(Nc3cnc4ccccc4n3)ccc2n5cccc15
6	GPER_PBX2	COc1cc(cc(OC)c1OC)C(=O)Nc2ccc3c(OC(=O)c4cccn34)c2
7	GPER_17bE2	C[C@]12CC[C@H]3[C@@H](CCc4cc(O)ccc34)[C@@H]1CC[C@@H]2O
8	GPER_E3	C[C@]12CC[C@H]3[C@@H](CCc4cc(O)ccc34)[C@@H]1C[C@@H](O)[C@@H]2O
9	GPER_OHT	CC\C(=C(/c1ccc(O)cc1)\c2ccc(OCCN(C)C)cc2)\c3ccccc3
10	GPER_MIBE	CCOC(=O)\C=C(/C)\Oc1ccc2c(c1)c(cn2C)\C(=C\C(=O)OCC)\C
11	GPER_GPERL1	CCN(CC)CCNCC1=NC2=C(C(=N)N1c3ccccc3)C(=S)N(C(=S)N2c4ccccc4)c5ccccc5
12	GPER_14a	Brc1ccc(cc1)c2nc3ccc(Br)cc3n4cccc24
13	GPER_15b	CC1=CC(=CC(=O)N1Cc2ccc(cc2)C(F)(F)F)NCc3ccc(cc3)C(F)(F)F
14	GPER_13	Brc1ccc(cc1)[C@@H]2Nc3ccc(Br)cc3n4cccc24
15	GPER_22	Oc1cccc(Nc2nc(NCc3ccccc3)nc4[nH]cnc24)c1

## Sheet: Decoys GPER-1
		Decoys GPER-1
Compound No.	Compound Code	SMILES
1	ZINC95527975	Cc1cc(C)n(n1)c2ccc(NC(=O)C3CCN(Cc4nncn4C)CC3)cc2
2	ZINC06147000	Fc1ccc(cc1)S(=O)(=O)[N-]c2ccccc2C(=O)Nc3cccc(c3)C(F)(F)F
3	ZINC05727962	COC(=O)C1C(C(C#N)C(=NC1=C)SCC(=O)NC2CC2)c3cccs3
4	ZINC19899936	COc1ccc(cc1)C2=CC(=O)NC(=N2)N3CCN(Cc4ccc5OCOc5c4)CC3
5	ZINC96002338	CC1(CCN(Cc2nc(N)c3c4CCCCc4sc3n2)CC1)C#N
6	ZINC20684641	CN(CC1CCCCO1)Cc2[nH]c(nc2C)c3ccccc3
7	ZINC54585968	CCOc1ccccc1CN(C)C(=O)C2=CC=CNC2=S
8	ZINC83241409	Cc1oc(cc1)c2cnc(C[NH2+]Cc3ccc(F)cc3)s2
9	ZINC78979835	O=C(N1CCCC1)c2cccc(CNCC3=Cc4ccccc4OC3)c2
10	ZINC19750443	Cc1ccc(Cn2c(nc3ccccc23)C(N)Cc4ccccc4)cc1
11	ZINC40224857	CC(O)c1[nH+]c2ccccc2n1CCOc3cc(C)ccc3C
12	ZINC30714425	Cc1ccccc1n2c([S-])nnc2c3sc4[nH+]cccc4c3N
13	ZINC65488571	OC(Cn1c[nH+]c(c2ccccc2)c1c3ccncc3)c4ccccc4
14	ZINC09219856	COc1ccc(cc1)C(NC(=O)c2ccc3ccccc3c2)c4[nH+]ccn4C
15	ZINC71906442	Cc1ccc(NC(=O)c2ccc(Br)cc2F)cc1[N-]S(=O)(=O)c3ccccc3
16	ZINC30714430	Cc1cc(C)cc(c1)n2c([S-])nnc2c3sc4[nH+]cccc4c3N
17	ZINC71958348	FC(F)(F)C1CCCC(C1)C(=O)Nc2cccc([N-]S(=O)(=O)c3ccccc3)c2
18	ZINC19750444	NC(Cc1ccccc1)c2nc3ccccc3n2Cc4ccc(Cl)cc4
19	ZINC00860663	COc1ccc(cc1)c2[nH+]c([nH]c2c3ccc(OC)cc3)c4cccs4
20	ZINC83241428	Cc1oc(cc1)c2cnc(C[NH2+]Cc3ccccc3F)s2
21	ZINC19750448	NC(Cc1ccccc1)c2nc3ccccc3n2Cc4ccccc4Cl
22	ZINC30714435	Cc1cccc(c1C)n2c([S-])nnc2c3sc4[nH+]cccc4c3N
23	ZINC71745888	CC(C)C1CN(Cc2ccccc2O)CCC(=O)N1Cc3ccc(F)cc3
24	ZINC12535833	C(Sc1nnc(c2cccnc2)n1C3CC3)c4[nH+]ccn4Cc5ccccc5
25	ZINC06146687	Cc1ccc(C)c(c1)S(=O)(=O)[N-]c2ccccc2C(=O)Nc3cc(Cl)cc(Cl)c3
26	ZINC57656159	[O-][N+](=O)CC(Nc1ccc(Cl)c(Cl)c1)c2cc[nH+]cc2
27	ZINC65322853	[O-]c1cc(CN2CCc3ccccc3C2)nc4nc(NCc5ccc(Cl)cc5)nn14
28	ZINC83241470	Brc1oc(cc1)c2cnc(C[NH2+]Cc3ccccc3)s2
29	ZINC08602151	FC(F)(F)c1ccc(NC(=O)CSc2[nH+]ccn2C3CCCC3)cc1
30	ZINC19750452	NC(Cc1ccccc1)c2nc3ccccc3n2Cc4ccc(F)cc4
31	ZINC06418822	Cc1cc(C(=O)CSc2nc(n[n-]2)c3cccs3)c(C)n1CC=C
32	ZINC01458018	[O-]c1[nH]c2c(Br)cc(Br)cc2c1\N=N\C(=O)c3occc3
33	ZINC71958360	Cc1ccc(CCCC(=O)Nc2cccc([N-]S(=O)(=O)c3ccccc3)c2)cc1
34	ZINC83241497	Cc1ccsc1c2cnc(C[NH2+]Cc3ccccc3)s2
35	ZINC19626838	CC(=O)\C(=C/c1c(C)nn(c1O)c2ccccc2)\c3onc(n3)c4ccccc4
36	ZINC57656162	[O-][N+](=O)CC(Nc1ccc(Cl)cc1Cl)c2cc[nH+]cc2
37	ZINC83241501	Cc1ccsc1c2cnc(C[NH2+]Cc3ccc(F)cc3)s2
38	ZINC19750455	NC(Cc1ccccc1)c2nc3ccccc3n2Cc4ccccc4F
39	ZINC08602143	Fc1cccc(NC(=O)CSc2[nH+]ccn2C3CCCC3)c1
40	ZINC04795242	Cc1ccc(cc1)S(=O)(=O)Nc2ccccc2\C=N/c3cccc(C)c3
41	ZINC05399607	Cc1c(Cl)cccc1NC(=O)\C(=C\C(=O)\C=C\c2ccccc2)\[O-]
42	ZINC67833982	Cc1cnc(C)c(n1)c2cc(O)c3OCCN(Cc3c2)C4CCOCC4
43	ZINC06101750	Cc1ccc(cc1)S(=O)(=O)Nc2ccccc2\C=N/c3ccc(Br)cc3
44	ZINC76041975	O=C(N1CCC(COCc2ccccc2)C1)C3=CC=CNC3=S
45	ZINC02821692	Cc1ccc(cc1)S(=O)(=O)[N-]c2ccc(NC(=O)c3c(F)c(F)c(F)c(F)c3F)cc2
46	ZINC19750459	Cc1ccccc1Cn2c(nc3ccccc23)C(N)Cc4ccccc4
47	ZINC83241520	Cc1ccsc1c2cnc(C[NH2+]Cc3ccccc3F)s2
48	ZINC71958371	Clc1cc(Br)ccc1C(=O)Nc2cccc([N-]S(=O)(=O)c3ccccc3)c2
49	ZINC57656166	[O-][N+](=O)CC(Nc1cc(Cl)ccc1Cl)c2cc[nH+]cc2
50	ZINC71936666	Fc1ccc(CN(C2CC2)C(=O)NC3CCN(CC3)c4ccccn4)cc1
51	ZINC05931590	CN(C)c1ccc(cc1)C2C3=C(CCCC3=O)Nc4nc(SCC=C)nc([O-])c24
52	ZINC77459390	CN(Cc1onc(c1)c2cccnc2)Cc3ccc(Cn4cccn4)cc3
53	ZINC96002656	Fc1ccc(cc1)c2nnc3CCC(Cn23)NCc4ccc(cc4)n5cncn5
54	ZINC32601176	C\C=C(/C=C\C=C)\c1c(O)c2ccccc2c([O-])c1C(=O)c3ccccc3
55	ZINC08602123	Cc1cc(C)cc(NC(=O)CSc2[nH+]ccn2C3CCCC3)c1
56	ZINC71928416	CC(C1CC1)N(C)C(=O)NCc2ccc(nc2)N3CCCCCC3
57	ZINC71958392	Cc1ccc(NC(=O)C2CCCC(C2)C(F)(F)F)cc1[N-]S(=O)(=O)c3ccccc3
58	ZINC08602121	Cc1ccc(NC(=O)CSc2[nH+]ccn2C3CCCC3)cc1
59	ZINC40034346	Cc1nc([S-])sc1CC(=O)Nc2nc3CCN(Cc4ccccc4)Cc3s2
60	ZINC57656169	[O-][N+](=O)CC(Nc1cc(Cl)cc(Cl)c1)c2cc[nH+]cc2
61	ZINC12559353	Fc1cccc(NC(=O)c2cccc(OCc3cn4ccccc4[nH+]3)c2)c1
62	ZINC95436017	CC(C)(C)SCCCC(=O)N1CCC(CC1)c2cc[nH]n2
63	ZINC05923708	CCCSc1nc([O-])c2C(C3=C(CCCC3=O)Nc2n1)c4cccc(OC)c4
64	ZINC71958402	Cc1ccc(CCCC(=O)Nc2ccc(C)c([N-]S(=O)(=O)c3ccccc3)c2)cc1
65	ZINC55182922	CN(Cc1onc(n1)c2cccc(C)c2)Cc3ccccc3Cn4cccn4
66	ZINC71958405	Cc1ccc(NC(=O)c2ccc(Br)cc2Cl)cc1[N-]S(=O)(=O)c3ccccc3
67	ZINC02805961	COc1ccc(\C=N\[N-]S(=O)(=O)c2ccccc2)cc1OC(=O)c3ccccc3
68	ZINC05923799	CCCSc1nc([O-])c2C(C3=C(CCCC3=O)Nc2n1)c4ccc(OC)cc4
69	ZINC06294498	CCOc1ccc(cc1)S(=O)(=O)[N-]\N=C(\C)/c2ccc(cc2)n3ccnc3
70	ZINC06146629	Cc1cc(F)ccc1S(=O)(=O)[N-]c2ccccc2C(=O)Nc3cc(Cl)cc(Cl)c3
71	ZINC65404704	COCCn1cnnc1C(C)n2c[nH+]c(c3ccccc3)c2c4ccsc4
72	ZINC71827458	Fc1cc(Br)ccc1NC(=O)c2ccc(SCc3cn4ccccc4[nH+]3)cc2
73	ZINC05923790	CCCSc1nc([O-])c2C(C3=C(CCCC3=O)Nc2n1)c4ccc(cc4)N(C)C
74	ZINC15974297	COc1ccc(cc1)N2C(=O)CC(S\C(=N\N=C/c3ccnc4ccccc34)\N)C2=O
75	ZINC06146632	Cc1cc(F)ccc1S(=O)(=O)[N-]c2ccccc2C(=O)Nc3ccc(Br)cc3
76	ZINC32972044	CCn1nc(C)c(C[N-]\C(=N/C(=O)c2cc(C)cc(C)c2)\Nc3ccccc3F)c1C
77	ZINC46127486	COc1cccc(c1)C(=O)\N=C(/NCc2cccnc2)\[N-]c3cccc(Cl)c3C
78	ZINC30570676	CC1CC[NH+](Cc2csc(\N=C(/[O-])\c3nc(sc3C)c4occc4)n2)CC1
79	ZINC12575903	CCOc1ccc(cc1OC)c2nc(CSc3[nH+]ccn3C)cs2
80	ZINC16050528	CCCC1=CC(=O)N=C(N1)SCC2=CC(=O)N3C(=N2)Sc4ccccc34
81	ZINC95508167	C1CC(CN(C1)c2nnnn2c3ccc(Oc4ccccc4)cc3)c5ncc[nH]5
82	ZINC19867000	CN(CCc1scnc1C)Cc2cccc(c2)c3nc([O-])cc(n3)C(F)F
83	ZINC06003402	CCC(C)Sc1nc([O-])c2C(C3=C(CCCC3=O)Nc2n1)c4cccc(OC)c4
84	ZINC31153552	Cc1cccc(c1)c2noc(n2)C3Cc4[nH]cnc4CN3Cc5ccc(cc5)C(=O)[O-]
85	ZINC22094751	CC(Sc1nnc([O-])n1CCc2ccccc2)C(=O)c3ccc(Cl)cc3
86	ZINC27027394	CCc1ccc(cc1)N(CC(=O)c2ccc(OC)c(OC)c2)C3=NCCCS3
87	ZINC06003391	CCC(C)Sc1nc([O-])c2C(C3=C(CCCC3=O)Nc2n1)c4ccc(OC)cc4
88	ZINC16393592	CC(=O)c1sc2nc(SCC(=O)Nc3ccccc3)nc([O-])c2c1C
89	ZINC48355460	COCCn1c(C)c(C)[nH+]c1SC(C)c2onc(n2)c3ccccc3
90	ZINC33326847	CCOC(=O)c1c2CCN(C)Cc2sc1\N=C/c3cccc(OC)c3O
91	ZINC06009462	COc1cccc(c1)C2C3=C(CCCC3=O)Nc4nc(SCC=C)nc([O-])c24
92	ZINC06146992	Fc1ccc(cc1)S(=O)(=O)[N-]c2ccccc2C(=O)Nc3ccc(Cl)cc3Cl
93	ZINC32972050	CCn1nc(C)c(C[N-]\C(=N/C(=O)c2cc(C)cc(C)c2)\Nc3ccc(F)cc3)c1C
94	ZINC05931328	CCC(C)Sc1nc([O-])c2C(C3=C(CCCC3=O)Nc2n1)c4ccc(cc4)N(C)C
95	ZINC17949590	COc1ccc(cc1)N2C(=O)CC(S\C(=N\N=C(\C)/c3cccs3)\N)C2=O
96	ZINC13550669	COc1ccc(cc1OC)c2csc(n2)C3=C(N)N(CC3=O)C4CCCC4
97	ZINC17112038	COc1ccc2N3C(=NC(=C(C3=O)c4c(C)cc(C)cc4C)O)Sc2c1
98	ZINC06009071	COc1ccc(cc1)C2C3=C(CCCC3=O)Nc4nc(SCC=C)nc([O-])c24
99	ZINC83434004	Fc1ccc(cc1)c2nc([nH]c2c3ccncc3)c4ccc(cc4)S(=O)CCl
100	ZINC20227359	Clc1ccc(NC2=NC(=O)\C(=C/c3oc(Br)cc3)\S2)cc1
101	ZINC33261526	Fc1ccc2[nH]c(cc2c1)c3ccc([N-]S(=O)(=O)c4ccc(cc4)N5CCCC5=O)cc3
102	ZINC33261527	Clc1ccc2[nH]c(cc2c1)c3ccc([N-]S(=O)(=O)c4ccc(cc4)N5CCCC5=O)cc3
103	ZINC24969139	N#Cc1cccc(CSc2nnc(CN3CCCC3)n2Cc4ccccc4)c1
104	ZINC13683537	COc1ccc(CC\N=C(/C)\c2c([O-])oc(c2[O-])c3ccccc3)cc1OC
105	ZINC04194188	CCOc1ccc(cc1)C2C3=C(CC(C)(C)CC3=O)Nc4nc(SCC)nc([O-])c24
106	ZINC39978272	COc1ccc(c(OC)c1)c2nc(CN3CCN(Cc4ccccc4)CC3)cs2
107	ZINC06146613	Cc1cc(F)ccc1S(=O)(=O)[N-]c2ccccc2C(=O)NC3CCCCCCC3
108	ZINC95464234	CCc1cnc([N-]S(=O)(=O)CCc2ccccc2[N+](=O)[O-])s1
109	ZINC03375314	FC(F)(F)c1cccc(NC2=NC(=O)\C(=C/c3cccc(c3)C(F)(F)F)\S2)c1
110	ZINC15015430	Cc1cc(cc2\C(=N\NC(=O)COc3ccc(Cl)cc3Cl)\C(=Nc12)[O-])[N+](=O)[O-]
111	ZINC09174850	Cc1cccc(c1)N2C(C(=C(O)C2=O)C(=O)\C=C\c3ccccc3)c4ccc(F)cc4
112	ZINC48355784	CC(C)c1onc(CN2CCN(CCOc3ccc(Cl)cc3)CC2)n1
113	ZINC32972063	CCn1nc(C)c(C[N-]\C(=N/C(=O)c2cc(C)cc(C)c2)\Nc3ccc(Cl)cc3C)c1C
114	ZINC13127377	[O-]C1=Nc2nc(NC(=O)COc3ccc(Cl)cc3Cl)nn2C(C1)c4ccccc4
115	ZINC35539163	COc1ccc(Cl)cc1NS(=O)(=O)c2cc(sc2C)c3noc(C)n3
116	ZINC35539167	COc1ccc(NS(=O)(=O)c2cc(sc2C)c3noc(C)n3)cc1Cl
117	ZINC35539201	COc1ccccc1NS(=O)(=O)c2cc(sc2C)c3noc(C)n3
118	ZINC23139716	CN1CCN(CC1)c2nnc(SCC(=O)Nc3ccccc3C(F)(F)F)s2
119	ZINC02597762	O=C(CCn1c[nH+]c(c2ccccc2)c1c3ccccc3)N\N=C\C=C\c4ccccc4
120	ZINC71498502	COc1ccc(OC)c(c1)c2oc(C)c(CN3CCC4(CC3)CNC(=O)O4)n2
121	ZINC23139719	CN1CCN(CC1)c2nnc(SCC(=O)Nc3cccc(c3)C(F)(F)F)s2
122	ZINC19524068	CCn1ncc(c1C)c2csc(NC(=O)C3CCCN(C3)c4ccccn4)n2
123	ZINC17073797	Cc1cccc(c1)C(=O)NN2C(=C3C4=C(CCC4)SC3=NC2=S)[O-]
124	ZINC55196840	CCc1onc(CN(C)Cc2c(C)cc(C)c(COC(=O)C)c2C)n1
125	ZINC65404972	CCCn1cnnc1Cn2c[nH+]c(c3ccccc3)c2c4cn(CC)nc4C
126	ZINC09237736	Oc1ccc(Br)cc1c2n[n-]c(Sc3ccc(C=O)cc3[N+](=O)[O-])n2
127	ZINC17073796	Cc1ccccc1C(=O)NN2C(=C3C4=C(CCC4)SC3=NC2=S)[O-]
128	ZINC02914798	Fc1ccc(Br)cc1C2CC(N=C3N=CNN23)c4cccc(Br)c4
129	ZINC72117188	CCCCc1ccc([N-]S(=O)(=O)c2ccc(C)c(c2)C(=O)NCC(F)(F)F)cc1
130	ZINC72117189	CCCCc1ccc([N-]S(=O)(=O)c2cccc(c2)C(=O)NCC(F)(F)F)cc1
131	ZINC18255977	OC1=C\C(=N/c2ccc(F)c(c2)C(F)(F)F)\c3ccccc3C1=O
132	ZINC26040154	CS(=O)(=O)[N-]c1ccc(cc1)C(=O)CSc2nc(cs2)c3ccccc3
133	ZINC69451346	CN(CCOc1cccc(Cl)c1)Cc2oc(nn2)c3occc3
134	ZINC00633995	Clc1ccc(cc1)C2CC(N3NC=NC3=N2)c4ccc(Br)cc4
135	ZINC06270602	FC(F)(F)c1cc(NC(=O)c2ccc([N-]S(=O)(=O)c3ccccc3)cc2)ccc1Cl
136	ZINC89960665	CCCn1c(SCCn2c(C)[nH+]c3ccccc23)nnc1c4ccncc4
137	ZINC71289419	O=C1N(Cc2occc2)C(=S)Nc3c1sc4ncccc34
138	ZINC16282075	Cc1cc(I)ccc1\N=C\2/C=C(O)C(=O)c3ccccc23
139	ZINC16357073	CN(CCOc1ccc(Cl)cc1)CN2N=C(C3CC3)N(C)C2=S
140	ZINC83923532	COc1cc(ccc1OC(F)F)C(=O)\C=C\c2cc([O-])ccc2[N+](=O)[O-]
141	ZINC32972080	CCn1nc(C)c(CN\C(=N/C(=O)c2cccc(F)c2)\[N-]c3ccccc3C)c1C
142	ZINC20876184	COc1cccc(CNCc2ccccc2Cl)c1OCc3ccc(F)cc3Cl
143	ZINC77303389	CC1(CCC2C3CCC4Cc5n[nH]cc5CC4(C)C3CCC12C)OC6CCCCO6
144	ZINC12378353	CC(=O)c1ccc(N\C(=N\S(=O)(=O)c2ccc(C)cc2)\c3ccc(Cl)cc3)cc1
145	ZINC08180645	Cc1ccc(C)c(NC(=O)c2cccc([N-]S(=O)(=O)c3ccc(C)c(F)c3)c2)c1
146	ZINC72112868	Cc1ccc(cc1)S(=O)(=O)[N-]c2ccc(NC(=O)c3cccc(c3)C(F)(F)F)cc2
147	ZINC72112869	Cc1ccc(cc1)S(=O)(=O)[N-]c2ccc(NC(=O)c3ccc4ccccc4c3)cc2
148	ZINC22925601	CC(N1CCN(CCOc2ccccc2)CC1)c3oc(nn3)c4ccc(F)cc4
149	ZINC19229026	CN(CCn1ccnc1)Cc2onc(Cc3cccc(c3)C(F)(F)F)n2
150	ZINC21033541	COc1cc([N-]S(=O)(=O)c2ccc(cc2)c3oc(nc3)C4CC4)cc(OC)c1
151	ZINC08572821	COc1ccc2N3C(=NC(=C(C3=O)c4ccccc4)O)Sc2c1
152	ZINC03306318	COC(=O)c1ccc(\C=C\C(=N\CCC(c2ccccc2)c3ccccc3)\O)cc1
153	ZINC20108540	O\C(=N/C1CCCCC1)\C(N2CCN(CC2)C3CCCCC3)c4ccc(Cl)cc4
154	ZINC47417379	Clc1ccc(cc1)S(=O)(=O)[N-]c2cccc(OCCn3cncn3)c2
155	ZINC47417363	O=S(=O)([N-]c1cccc(OCCn2cncn2)c1)c3ccc4ccccc4c3
156	ZINC47417438	O=S(=O)([N-]c1cccc(OCCn2cncn2)c1)c3ccc4CCCc4c3
157	ZINC47417471	Cc1c[nH+]c2c(cccc2c1)S(=O)(=O)[N-]c3cccc(OCCn4cncn4)c3
158	ZINC16319444	O=S(=O)(\N=C(/[N-]\C(=N/c1ccccc1)\Nc2ccccc2)\c3ccccc3)c4ccccc4
159	ZINC11394997	CC(C)SC1=NC(=C(c2nc(C)cs2)C3(CCCCC3)C1C#N)N
160	ZINC32972088	CCn1nc(C)c(CN\C(=N/C(=O)c2cccc(F)c2)\[N-]c3cc(C)ccc3C)c1C
161	ZINC06269933	Cc1ccc(cc1)S(=O)(=O)[N-]c2ccc(cc2)C(=O)Nc3ccc(Br)c(Cl)c3
162	ZINC19788496	Cc1ncc2CNCCc2c1c3noc(n3)C4Cc5ccccc5O4
163	ZINC04757316	CCCCc1ccc(cc1)C(=O)Nc2ccc3nc(cc(C)c3c2)N(CC)CC
164	ZINC62957572	CCN(CC)c1ccc(\C=C\2/Oc3c(C)c(OC(C)C(=O)OC)ccc3C2=O)cc1
165	ZINC62957574	CCN(CC)c1ccc(\C=C\2/Oc3cc(OC(C)C(=O)OC)cc(C)c3C2=O)cc1
166	ZINC62957576	CCN(CC)c1ccc(\C=C\2/Oc3cc(OC(C)C(=O)OC)ccc3C2=O)cc1
167	ZINC71260559	CCN(CC)Cc1nnc2sc(Cc3ccc(cc3)c4ccccc4)nn12
168	ZINC16294409	FC(F)(F)Oc1ccc(N\C(=N/S(=O)(=O)c2ccccc2)\c3ccc(Cl)cc3)cc1
169	ZINC19536140	CCOc1cc(CN2CCN(Cc3ccc4OCOc4c3)CC2)ccc1OC
170	ZINC06266834	CCCCc1ccc(NC(=O)c2ccc([N-]S(=O)(=O)c3ccccc3)cc2)cc1
171	ZINC08424558	[O-]c1ccc(cc1c2[nH+]c(c3ccc(cc3)c4ccccc4)c([nH]2)c5ccccc5)[N+](=O)[O-]
172	ZINC36729292	Clc1ccc(C2=NNC(=S)N2c3ccc(Br)cc3)c(Cl)c1
173	ZINC15784631	CC(C)C(NC(=S)c1ccccc1)C(C(=O)c2ccccc2)C(=O)c3ccccc3
174	ZINC35313066	CC(C)c1ccc2nc3sc(C(=O)N4CCc5ccccc45)c(N)c3cc2c1
175	ZINC06456955	Fc1ccc(cc1)\C(=N\S(=O)(=O)c2ccc(Cl)cc2)\Nc3ccc(OC(F)(F)F)cc3
176	ZINC08207557	Cc1ccc(cc1F)S(=O)(=O)[N-]c2cccc(c2)C(=O)Nc3cccc(C)c3C
177	ZINC84593437	FC(F)(F)c1cc(nc2NC(=O)c3ccccc3c12)c4ccncc4
178	ZINC05596031	[O-]C1=C(C2OC(=O)c3ccccc23)C(=O)N(C4CCCCC4)C(=S)N1
179	ZINC40285957	CC(C)(C)c1cc([nH]n1)c2nn3c(nnc3s2)c4ccc(F)cc4
180	ZINC23941211	CCN(Cc1ccccc1)C(=O)C(C)Sc2nc(Cc3ccccc3)c(C)[nH]2
181	ZINC33042874	CCC1N(Cc2c3CCCCc3sc2n4cccc14)C(=O)Nc5cc(Cl)ccc5C
182	ZINC02999359	COc1cc(SC)ccc1C(=O)NCCC(c2ccccc2)c3ccccc3
183	ZINC58061597	Cc1ccc(NC(=O)N2CCC(CC2)c3oc4ccc(Cl)cc4n3)c(Br)c1
184	ZINC76861278	Clc1ccc2NCC3(CCCCCC3)Nc2c1
185	ZINC13132456	CC1(CCC(=O)O1)C2CCC3C4CC=C5CC(O)CCC5(C)C4CCC23C
186	ZINC75140886	Cc1oc2ncnc(NC(=O)c3cnc(C)s3)c2c1C
187	ZINC17121840	Cc1ccc2N=C3SC(=NN3C(=O)c2c1)Nc4ccccc4
188	ZINC95075814	CNc1nc2ccccc2nc1N3CCN(C(C)C3)C(=O)OC(C)(C)C
189	ZINC13689794	Oc1cccc(c1)N2C(=S)S\C(=C\c3cnc4ccccc4n3)\C2=O
190	ZINC02971950	Fc1ccccc1NC2=NN3C(=Nc4ccccc4C3=O)S2
191	ZINC17121844	Cc1ccc2N=C3SC(=NN3C(=O)c2c1)Nc4ccccc4C
192	ZINC02971951	Fc1ccc(NC2=NN3C(=Nc4ccccc4C3=O)S2)c(F)c1
193	ZINC35399284	Cc1ccc2c(NC3(CCN(CC3)S(=O)(=O)c4cccc(Cl)c4)c5cccn25)c1
194	ZINC13844123	Cc1ccc(C)c(c1)N2C(=O)C3C(C4c5ccccc5C3c6ccccc46)C2=O
195	ZINC12550498	O=C1N(Cc2ccccc2)c3ccccc3C14Nc5ccccc5c6nc7ccccc7n46
196	ZINC20863796	Fc1ccc(NC(=O)N2Cc3ccccc3Sc4ncccc24)cc1
197	ZINC17121848	Cc1ccc2N=C3SC(=NN3C(=O)c2c1)Nc4ccccc4F
198	ZINC05445989	CC12CC3(C)CC(C)(C1)CC(C3)(C2)C(=O)Nc4ccc5C(=O)c6ccccc6C(=O)c5c4
199	ZINC05175618	CCC(=O)N1C(C2=C(CC(C)(C)CC2=O)Nc3ccccc13)c4ccc(cc4)C#N
200	ZINC35399286	Cc1ccc2c(NC3(CCN(CC3)S(=O)(=O)c4ccccc4Cl)c5cccn25)c1
201	ZINC02562150	N\C(=C(/N=C/C1=COc2c(Cl)cc(Cl)cc2C1=O)\C#N)\C#N
202	ZINC95075819	CNc1nc2ccccc2nc1N3CCN(CC3C)C(=O)OC(C)(C)C
203	ZINC03644324	C\C=C(\C)/C(=O)OC1C(O)C(C)(C)Oc2ccc3C=CC(=O)Oc3c12
204	ZINC03345035	CCCC(C)NC(=O)c1ccc(OCc2ccc(Cl)cc2)c(OC)c1
205	ZINC01030910	CC1=C(C#N)C(C2=C(CCCC2=O)N1)c3ccc(cc3Cl)C(F)(F)F
206	ZINC54361173	O=C1N=C(Nc2ccccn2)S/C/1=C\c3cnc4ccccc4n3
207	ZINC00727239	CCOC(=O)NC1(Oc2cc(Cl)c(Cl)cc2O1)C(Cl)(Cl)Cl
208	ZINC15835467	Cc1c(oc2cc(Br)ccc12)C(=O)Nc3cccc4cccnc34
209	ZINC19594842	Nc1nc2CCCCCCc2c(c3ccc(Cl)cc3Cl)c1C#N
210	ZINC01157895	Clc1cc(Cl)c2OC(=O)C(=Cc2c1)C(=O)Nc3ccc4ccccc4c3
211	ZINC12504523	CC(=O)C1(O)CCC2C3C=C(Cl)C4=CC(=O)C5CC5C4(C)C3CCC12C
212	ZINC00650801	Cc1ccc(cc1C)c2cc(n3nc(cc3n2)C(=O)NC(C)(C)C)C(F)(F)F
213	ZINC06839248	CCCCC(=O)Nc1cccc(c1)C2SCC(=O)N2c3ccccc3CCC
214	ZINC33042898	CCC1N(Cc2c3CCCCc3sc2n4cccc14)C(=O)Nc5ccc(C)cc5C
215	ZINC41352905	FC(F)(F)C1=CC(=O)c2cc(NC(=O)c3oc4ccccc4c3)ccc2O1
216	ZINC19074419	FC(F)(F)c1cc(cc(c1)C(F)(F)F)C(=O)Nc2nc3c(ccc4ccccc34)s2
217	ZINC35399295	Cc1cc(C)c(c(C)c1)S(=O)(=O)N2CCC3(CC2)Nc4cc(F)ccc4n5cccc35
218	ZINC06276468	Nc1c(sc2nc3CCCCCCc3cc12)C(=O)c4ccc(Cl)cc4Cl
219	ZINC36151390	COc1ccccc1c2nnc3SCC(Nn23)C(C)(C)C
220	ZINC12496565	CN(C)c1ccc(\C=C\2/CC3C4CC=C5CC(O)CCC5(C)C4CCC3(C)C2=O)cc1
221	ZINC33042905	CCC1N(Cc2c3CCCCc3sc2n4cccc14)C(=O)Nc5cccc6CCCCc56
222	ZINC02965040	CCN(CC)c1ccc(NC(=O)c2ccc(OCc3ccccc3)cc2)cc1
223	ZINC04697724	CC(C)(C)NC(=O)c1ccc2nc3c4ccccc4c5ccccc5c3nc2c1
224	ZINC54361188	Oc1cccc(c1)N2C(=S)S\C(=C/c3cnc4ccccc4n3)\C2=O
225	ZINC35399302	Fc1ccc2c(NC3(CCN(CC3)S(=O)(=O)c4ccc5ccccc5c4)c6cccn26)c1
226	ZINC54361189	Oc1ccc(cc1)N2C(=S)S\C(=C/c3cnc4ccccc4n3)\C2=O
227	ZINC33042909	CCC1N(Cc2c3CCCCc3sc2n4cccc14)C(=O)Nc5ccc(F)cc5
228	ZINC07700550	Oc1cccc(\C=C\2/CCN3C(=O)c4cc(ccc4N=C23)[N+](=O)[O-])c1
229	ZINC36151396	COc1cccc(c1)c2nnc3SCC(Nn23)C(C)(C)C
230	ZINC04697728	Cc1ccc(NC(=O)c2ccc3nc4c5ccccc5c6ccccc6c4nc3c2)cc1
231	ZINC92062514	CC(C)c1nc(C)c(s1)C(=O)N2CCc3nc(N)sc3C2
232	ZINC33042913	CCC1N(Cc2c3CCCCc3sc2n4cccc14)C(=O)Nc5ccc(C)c(F)c5
233	ZINC06738781	Oc1cccc2ccc(nc12)C3SCC(=O)N3c4ccc(F)c(Cl)c4
234	ZINC33042916	CCC1N(Cc2c3CCCCc3sc2n4cccc14)C(=O)Nc5cc(F)ccc5F
235	ZINC75535452	Cc1nnc2ccc(cn12)c3noc(n3)c4ccc5cc[nH]c5c4
236	ZINC75535453	Cc1nnc2ccc(cn12)c3noc(n3)c4cccc5[nH]ccc45
237	ZINC10532861	Cc1sc2nc(CSC(=S)N3CCCC3)nc(N)c2c1C
238	ZINC35399310	Cc1ccc(C)c(c1)S(=O)(=O)N2CCC3(CC2)Nc4cc(F)ccc4n5cccc35
239	ZINC00570201	Nc1c(Cl)cc2oc(nc2c1Cl)c3ccc(Cl)cc3Cl
240	ZINC19832200	CC1=C(C#N)C(C2=C(CCCC2=O)N1)c3ccccc3C(F)(F)F
241	ZINC09322162	Cc1ccc(cc1)N2C(=S)NC(=O)\C(=C/c3c4ccccc4cc5ccccc35)\C2=O
242	ZINC36151403	COc1ccc(cc1)c2nnc3SCC(Nn23)C(C)(C)C
243	ZINC33042923	CCC1N(Cc2c3CCCCc3sc2n4cccc14)C(=O)Nc5ccc(F)cc5F
244	ZINC04367880	CC(=O)C12CC(=C(C)CC1CC3C4CCC5=CC(=O)CCC5(C)C4CCC23C)C
245	ZINC35399317	Cc1ccc(c(C)c1)S(=O)(=O)N2CCC3(CC2)Nc4cc(F)ccc4n5cccc35
246	ZINC72030176	COc1ccc(CNC(=O)CC(C)c2ccc(cc2)C(F)(F)F)cc1OC(F)F
247	ZINC01335349	FC(F)(F)c1cc(Cl)ccc1NC(=O)N2CCC(CC2)c3nc4ccccc4s3
248	ZINC35399318	Cc1ccc(cc1C)S(=O)(=O)N2CCC3(CC2)Nc4cc(F)ccc4n5cccc35
249	ZINC04728331	COC(=O)C1=C(C)NC2=C(C1c3cccc(Cl)c3Cl)C(=O)CC(C)(C)C2
250	ZINC58514064	Cc1cc(NC(=O)N2CCc3ccc(Cl)cc23)n(n1)C(C)(C)C
251	ZINC68587148	Cc1ccc2C3C4C(C(c5ccccc35)c2c1)C(=O)N(C4=O)c6ccccc6C
252	ZINC76861307	CC1CCC2(CC1)CNc3ccc(F)cc3N2
253	ZINC03075911	ClC1=C(Cl)\C(=N/C(=O)c2ccc(Cl)cc2)\c3ccccc3C1=O
254	ZINC08684772	CC1CC2=C(C(Sc3ccccc3N2)c4ccc(F)cc4)C(=O)C1
255	ZINC02727674	Cc1ccc(NC(=S)N2CCSC2c3ccc(Br)s3)cc1
256	ZINC23324576	COc1ccc(cc1)n2c(CCC(=O)NCC3CC3)ccc2c4ccc(Cl)cc4
257	ZINC68739421	CC1=[N+]2C(=NC(=O)\C(=C\c3cc(C)n(c3C)c4ccc(Cl)cc4)\C2=N)SC1
258	ZINC00570200	Nc1c(Cl)cc2oc(nc2c1Cl)c3cc(Cl)ccc3Cl
259	ZINC71624518	Cc1c(Br)c(N)c(Br)nc1c2ccccc2Cl
260	ZINC68587156	Cc1cccc(c1)N2C(=O)C3C(C4c5ccccc5C3c6ccc(C)cc46)C2=O
261	ZINC06438247	Clc1cc(Cl)cc(c1)\N=C/2\C(=O)Nc3ccc(Br)cc23
262	ZINC01023654	Clc1ccc2nc(sc2c1)N3CCCN(CC3)C(=S)Nc4ccccc4
263	ZINC05562048	CC(=O)OC1CCC2(C)C3CCC4(C)C(CCC4\C(=N/O)\C)C3CC=C2C1
264	ZINC01393326	FC(F)(F)c1cnc2c(nn(C(=O)Nc3ccc(Cl)cc3)c2c1)c4ccccc4
265	ZINC68587163	Cc1ccc(cc1)N2C(=O)C3C(C4c5ccccc5C3c6ccc(C)cc46)C2=O
266	ZINC08821938	Cn1cc(\C=C\2/SC(=NC2=O)NC(=O)c3ccccc3Br)c4ccccc14
267	ZINC00570167	Nc1c(Cl)cc2oc(nc2c1Cl)c3ccc(F)cc3Cl
268	ZINC37600827	CC(C)CNC(=O)Cc1cccc(c1)N(Cc2ccccc2)C(=O)c3cccs3
269	ZINC08828418	CC1C=C(\C=C\2/SC(=NC2=O)Nc3ccc(Cl)cc3C(F)(F)F)c4ccccc14
270	ZINC33042952	CCc1ccc(NC(=O)N2Cc3c4CCCCc4sc3n5cccc5C2C)cc1
271	ZINC17056747	CC1(C)Cc2ccccc2C3=C1C(=O)N(C(=S)N3)c4ccccc4
272	ZINC03349281	CCCCOc1ccc(cc1OCC)C(=O)Nc2c(F)cccc2F
273	ZINC01955825	Oc1c(Br)cc(Br)cc1\C=N\c2sc3CCCCc3c2C#N
274	ZINC68587171	Cc1ccc(N2C(=O)C3C(C4c5ccccc5C3c6ccc(C)cc46)C2=O)c(C)c1
275	ZINC05898322	Cc1cccc(NC(=O)N2c3ccccc3Sc4ccccc24)n1
276	ZINC58871134	Clc1ccccc1COc2ccc(\C=N\NC(=O)CCc3ccccc3)cc2
277	ZINC04694435	CCCc1ccc(OCCNC(=O)c2oc(cc2)c3ccc(Cl)cc3)cc1
278	ZINC01157966	CC1(C)CC(=O)C2=C(C1)C(Nc3ccc4ccccc4c23)c5ccc(F)cc5
279	ZINC76861321	Fc1ccc2NCC3(CCCCCC3)Nc2c1
280	ZINC37600839	CCC(=O)N(Cc1ccccc1)c2cccc(CC(=O)Nc3ccc(OC)cc3)c2
281	ZINC04827330	Clc1c(Cl)c(NC2CCCCC2)c3C(=O)c4ccccc4C(=O)c3c1Cl
282	ZINC00858071	Oc1c(Cl)cc(Br)cc1\C=N\c2sc3CCCCc3c2C#N
283	ZINC03018571	COC(=O)C1=C(C)NC2=C(C1c3ccccc3C(F)(F)F)C(=O)CC(C)(C)C2
284	ZINC17525249	CC1CCN(C(=O)c2ccccc2I)c3ccccc3S1
285	ZINC04626487	CCCCC(CC)CN1C(C(=C(O)C1=O)C(=O)C)c2ccccc2Cl
286	ZINC02447466	FC(F)(F)c1cc(ccc1Cl)N2C(=S)S\C(=C/c3c[nH]c4ccccc34)\C2=O
287	ZINC16283531	Cc1cc(C)nc(N\C(=N\C(=O)C(C)(C)C)\[N-]c2cccc(c2)C(F)(F)F)n1
288	ZINC06471815	O\N=C\1/C=C\C(=C(\C#N)/c2ccc(Cl)cc2)\C=C1Br
289	ZINC28428203	COc1ccc(CCNCc2cn(Cc3ccccc3Cl)c4ccccc24)cc1
290	ZINC04002525	FC(F)(F)c1cc(c2ccc3[nH+]c(cn3c2n1)c4ccccc4)C(F)(F)F
291	ZINC33274840	CCCCNC(=O)C1(CC1)c2ccc([N-]S(=O)(=O)c3ccc(F)c(Cl)c3)cc2
292	ZINC39379208	CC1CCCC(C)N1C(=O)c2ccc(cc2)\N=C\3/C=C(O)C(=O)c4ccccc34
293	ZINC04864722	CCCCC(=C1C(=O)CC(CC1=O)c2ccccc2)NCCc3ccccc3
294	ZINC80350099	FC(F)(F)c1cccc(c1)\N=C/2\C(\SC(N2)=O)=C/c3ccc(Cl)cc3
295	ZINC02451885	OC(=C1C(OC(=O)C1=O)c2ccc(Br)cc2)c3ccc(Cl)cc3
296	ZINC83238493	COc1ccccc1CC[NH2+]Cc2ncc(s2)c3ccc(cc3)c4ccccc4
297	ZINC83308397	Cc1cc(C)cc(c1)N2C(=O)NC(=O)\C(=C/c3c4ccccc4cc5ccccc35)\C2=O
298	ZINC20873936	COc1cccc(CNCc2ccccc2Cl)c1OCc3ccc(C)cc3
299	ZINC72380102	CC(C)c1ccc(OCCc2cc([nH]n2)C3CCN(C3)C(=O)Cc4ccccc4)cc1
300	ZINC01953633	[O-]c1c(Cl)cc(Br)cc1\C=C\2/S\C(=N/c3ccccc3Cl)\NC2=O
301	ZINC03667893	Cc1oc2cc(Br)c([O-])c(Br)c2c1c3ccccc3
302	ZINC01502364	[O-]c1c(Cl)cc(Cl)cc1\C=C\2/S\C(=N/c3ccccc3Cl)\NC2=O
303	ZINC01885895	[O-]c1c(Br)cc(Cl)cc1\C=C\2/S\C(=N/c3ccccc3Cl)\NC2=O
304	ZINC39379208	CC1CCCC(C)N1C(=O)c2ccc(cc2)\N=C/3\C=C(O)C(=O)c4ccccc34
305	ZINC83308479	Cc1cc(C)cc(c1)\N=C/2\NC(=O)\C(=C/c3cc(Cl)cc(Br)c3[O-])\S2
306	ZINC83308479	Cc1cc(C)cc(c1)\N=C\2/NC(=O)\C(=C/c3cc(Cl)cc(Br)c3[O-])\S2
307	ZINC04714930	OC(CC(=O)CC(=O)c1ccccc1)(\C=C\c2ccccc2)c3ccccc3
308	ZINC83238770	Fc1ccc(C[NH2+]Cc2ncc(s2)c3ccc(OCc4ccccc4)cc3)cc1
309	ZINC17156636	CC(CCc1ccccc1)NC(=O)c2ccc([N-]S(=O)(=O)c3ccc(F)cc3)cc2
310	ZINC05332178	Oc1c(Br)cc(Br)cc1c2nc3ccccc3s2
311	ZINC83238793	Fc1ccccc1C[NH2+]Cc2ncc(s2)c3ccc(OCc4ccccc4)cc3
312	ZINC13466864	CC12CCC3C(CCC4=CC(=O)C(CC34C)C(=O)C(F)(F)F)C1CCC2O
313	ZINC01124881	Cc1ccccc1N2C(=O)c3cccc4cc(Br)cc(C2=O)c34
314	ZINC02729071	CCCCOC(=O)c1ccc(NC(=O)\C=C\c2ccc(cc2)C(C)C)cc1
315	ZINC33042984	CC1N(Cc2c3CCCCc3sc2n4cccc14)C(=O)Nc5ccccc5C
316	ZINC00739978	CCOc1ccc(cc1)N(C\C=C\c2ccccc2)C(=O)Nc3cccc(OC)c3
317	ZINC08702036	COC(=O)c1ccc(cc1)C2Nc3c(Br)cccc3C4C5CCC(C5)C24
318	ZINC01858843	O=P(NC(c1ccccc1)c2ccccc2)(Oc3ccccc3)Oc4ccccc4
319	ZINC34776516	COC(=O)c1ccc(cc1)C2Nc3c(Cl)cc(Cl)cc3C4C5CCC(C5)C24
320	ZINC06110395	Clc1ccccc1NC2=NC(=O)\C(=C/c3ccc(Br)cc3)\S2
321	ZINC34148564	NC(=O)N1c2ccccc2C(=C(O)c3ccccc13)O
322	ZINC34776530	COC(=O)c1ccc(cc1)C2Nc3c(Cl)ccc(Cl)c3C4C5CCC(C5)C24
323	ZINC04074104	CC12CCC(O)CC1CCC3C2CCC4(C)C3=CC=C4C5=CC(=O)OC5
324	ZINC04708160	Clc1ccccc1C2Sc3ccccc3NC4=C2C(=O)CC(C4)c5ccccc5
325	ZINC01268468	CC1CCc2c(C1)sc(NC(=O)c3cccc4c(Cl)cccc34)c2C#N
326	ZINC33043016	CC1N(Cc2c3CCCCc3sc2n4cccc14)C(=O)Nc5ccc(F)cc5
327	ZINC33043019	CC1N(Cc2c3CCCCc3sc2n4cccc14)C(=O)Nc5ccc(C)c(F)c5
328	ZINC00828724	CC1CC(=O)C2=C(C1)c3c(NC2c4ccc(Cl)cc4)ccc5ccccc35
329	ZINC08739328	O=C1NC2(Nc3ccccc13)C(=O)Nc4ccccc24
330	ZINC03216891	CC(C)(C)c1ccc(cc1)C(=O)\N=C/2\N=C3C=CC=CN3Cc4ccccc24
331	ZINC04163536	CC(C)(C)c1ccc(cc1)C(=O)N2N=C3CCCCC3C2(O)C(F)(F)F
332	ZINC01035315	Cc1ccc(NC(=O)N2CCCN(CC2)C(=O)OC(C)(C)C)cc1Cl
333	ZINC06496533	ClC(Cl)(Cl)C(=O)Nc1cccc(c1)c2oc3ccc4ccccc4c3n2
334	ZINC05898402	OC1(CCC2CC1CCC2(O)C(F)(F)F)C(F)(F)F
335	ZINC20355249	Cc1ccc(\C=C/2\Sc3ccc(cc3NC2=O)C(=O)N4CCc5ccccc5C4)cc1
336	ZINC33043029	CC1N(Cc2c3CCCCc3sc2n4cccc14)C(=O)Nc5ccccc5F
337	ZINC68587228	Cc1ccc2C3C4C(C(c5ccccc35)c2c1)C(=O)N(C4=O)c6ccccc6Cl
338	ZINC02557198	CC12CCC3C(=CCc4cc(O)ccc34)C1CCC2O
339	ZINC34776564	COC(=O)c1ccc(cc1)C2Nc3c(Cl)c(Cl)ccc3C4C5CCC(C5)C24
340	ZINC35399386	Clc1ccc(cc1)C(=O)N2CCC3(CC2)Nc4ccccc4n5cccc35
341	ZINC68587234	Cc1ccc2C3C4C(C(c5ccccc35)c2c1)C(=O)N(C4=O)c6ccc(Cl)cc6Cl
342	ZINC01143861	Oc1c(Cl)cc(C=C2C(=O)c3ccccc3C2=O)cc1Br
343	ZINC04387846	CC12CCC(O)CC1=CCC3C2CCC4(C)C3C\C(=C/c5ccc(F)cc5)\C4=O
344	ZINC35399390	Clc1cccc(c1)C(=O)N2CCC3(CC2)Nc4ccccc4n5cccc35
345	ZINC68587242	Cc1ccc2C3C4C(C(c5ccccc35)c2c1)C(=O)N(C4=O)c6cc(Cl)ccc6Cl
346	ZINC35399396	Fc1ccccc1C(=O)N2CCC3(CC2)Nc4ccccc4n5cccc35
347	ZINC35973522	CCOC(=O)c1c(O)cc(O)cc1CCc2cc(O)cc(O)c2
348	ZINC68587249	Cc1ccc2C3C4C(C(c5ccccc35)c2c1)C(=O)N(C4=O)c6cccc(Cl)c6
349	ZINC21533957	Fc1cc(Br)ccc1NC(=O)N2Cc3cccn3c4ccccc24
350	ZINC33043064	CC(C)NC(=O)N1Cc2c3CCCCc3sc2n4cccc4C1C
351	ZINC67245917	Cc1ccc(N2C(=O)NC3CC2(C)Oc4ccc(Br)cc34)c(C)c1
352	ZINC00570203	Nc1c(Cl)cc2oc(nc2c1Cl)c3ccc(Cl)c(Cl)c3
353	ZINC35399403	Cc1ccccc1C(=O)N2CCC3(CC2)Nc4ccccc4n5cccc35
354	ZINC35399404	Cc1cccc(c1)C(=O)N2CCC3(CC2)Nc4ccccc4n5cccc35
355	ZINC35399405	Cc1ccc(cc1)C(=O)N2CCC3(CC2)Nc4ccccc4n5cccc35
356	ZINC01170946	Cc1ccc(cc1C)N2C(=O)C3C(C2=O)C4(C)c5ccccc5C3(C)c6ccccc46
357	ZINC05529968	CC1(O)CCC2C3CCC4CC(O)CCC4(C)C3CCC12C
358	ZINC01082724	CC1(C)CC2=C(C(c3ccccc3F)c4c(N2)ccc5ccccc45)C(=O)C1
359	ZINC70471842	COc1cc(Nc2nc3ccccc3nc2[N-]S(=O)(=O)c4ccc(NC(=O)c5ccc(C)c(OC)c5)cc4)cc(OC)c1
360	ZINC95471114	FC(F)(F)c1cccc(c1)N2C(=O)c3cccc4c(Br)ccc(C2=O)c34
361	ZINC06720215	CC1(C)CC(=O)C2=C(C1)c3c(NC2c4cccc(F)c4F)ccc5ccccc35
362	ZINC00446076	CC(C)(C)c1ccc2[nH]c3\C(=N\N)\CCCc3c2c1
363	ZINC44699395	NC(=O)NC(=O)N1c2ccccc2C=Cc3ccccc13
364	ZINC02277321	CN1c2ccccc2C(C)(CC1(C)C)c3ccc4C(=CC(C)(C)N(C)c4c3)C
365	ZINC76683527	CC1(C)Cc2cc3[nH]c(Cl)c(N)c3cc2O1
366	ZINC01855655	CC(=O)c1c2CCCCc2cc3CC4(Cc5cc6CCCC(=O)c6cc5C4)Cc13
367	ZINC01563092	ICC(=O)N1c2ccccc2Sc3ccc4ccccc4c13
368	ZINC04035923	CC1(C)CC(=O)C2C(c3ccccc3Cl)c4c(ccc5[nH+]cccc45)N=C2C1
369	ZINC10272297	CC12CCC(O)CC1=CCC3C4CC\C(=N\[NH3+])\C4(C)CCC23
370	ZINC04002742	Fc1ccccc1c2cn3c(ccc4c(cc([nH+]c34)C(F)(F)F)C(F)(F)F)n2
371	ZINC36611977	CC12CCC3C(CCC4C\C(=N\[NH3+])\CCC34C)C1CCC2O
372	ZINC71606880	CC(C)(C)C1N(CCc2ccc(N)cc12)C(=O)O
373	ZINC82330823	Clc1ccc2NC3CCCC3C(=O)Nc2c1
374	ZINC05431107	CC(C)(C)C1(C#N)C(=O)N(c2ccc(Cl)cc2)C13c4ccccc4c5ccccc35
375	ZINC01428317	Cc1ccc2c(c1)c3CCCC4N(CCn2c34)C(=O)c5cccc(Cl)c5
376	ZINC82330843	Clc1ccc2NC(=O)C3CCCC3Nc2c1
377	ZINC13301954	ClC1=CN2Cc3ccccc3\C(=N\C(=O)c4ccccc4Cl)\N=C2C=C1
378	ZINC20160514	Brc1ccc(C2=Cc3ccccc3OC2=O)c(Br)c1
379	ZINC00852634	Clc1c(sc2ccccc12)C(=O)N3c4ccccc4CCc5ccccc35
380	ZINC13301972	ClC1=CN2Cc3ccccc3\C(=N\C(=O)c4ccc(Cl)cc4)\N=C2C=C1
381	ZINC03119980	FC(F)(F)c1cc(Cl)c2ncc(nc2c1)c3ccc(Cl)c(Cl)c3
382	ZINC17783830	Cc1ccc(Cl)cc1N2C(=O)C3C(C2=O)C4(C)c5ccccc5C3(C)c6ccccc46
383	ZINC01051178	Clc1cc(ccc1Br)N2C(=O)c3ccc4CCc5ccc(C2=O)c3c45
384	ZINC13301986	ClC1=CN2Cc3ccccc3\C(=N\C(=O)c4ccc(Br)cc4)\N=C2C=C1
385	ZINC57331893	Cc1c(Br)cc(cc1Br)c2oc3ccc4ccccc4c3n2
386	ZINC57331896	Cc1c(Br)cc(cc1Br)c2nc3ccccc3s2
387	ZINC57331898	Cc1cc2oc(nc2cc1C)c3cc(Br)c(C)c(Br)c3
388	ZINC06500172	CC(C)(C)NC(=O)C1CCC2C3CCC4=CC(=O)CCC4(C)C3CCC12C
389	ZINC04795133	OC1CCCCc2ccc(CCCCC1O)cc2
390	ZINC75488761	CC1Oc2cc(N)ccc2NC1=[N+]3C(C)CCCC3C
391	ZINC95938000	CCc1cc2C(=O)c3c([nH]c4cc(ccc34)C#N)C(C)(C)c2cc1I
392	ZINC33976670	CC12CCC3C4CCC(O)CC4CCC3C1CCC2O
393	ZINC00401245	Nc1cc2C(O)c3ccccc3c2cc1Br
394	ZINC04320633	CC(=O)C12CC=CCC1CC3C4CC=C5CC(O)CCC5(C)C4CCC23C
395	ZINC05764505	CC12CCC3C(CCC4=CC(O)CCC34)C1CCC2O
396	ZINC04370414	CC1(O)CCC2C3CCC4CC(=O)\C(=C\c5ccccc5)\CC4(C)C3CCC12C
397	ZINC05766635	CC1=C2CCc3c2c(cc4c3ccc5ccccc45)C(O)C1O
398	ZINC20597624	Cc1cc(NC(=O)N2CC3CCCN3c4ccccc24)ccc1Br
399	ZINC45072056	OC1CC23CCCCCCCCCCC2(CC(O)C3)C1
400	ZINC75658541	CC#CC1NCCc2cc(c(O)c(c12)C(C)(C)C)C(C)(C)C
401	ZINC00301915	C1CCC2(CC1)Nc3cccc4cccc(N2)c34
402	ZINC08551666	CC12CCC3C(CC=C4CC(O)CCC34C)C1CCC2O
403	ZINC38999836	Nc1cc(Br)c(cc1N)C(F)(F)F
404	ZINC82194594	CC1(O)CCC2C3CCC4CC(O)C=CC4(C)C3CCC12C
405	ZINC75818566	CC#CC1NCCc2c(O)c(Cl)cc(Cl)c12
406	ZINC03999041	CC1CC(O)c2cc(Br)ccc2N1
407	ZINC12523848	Clc1ccc(C2Nc3ccccc3c4[nH+]c5ccccc5n24)c(Cl)c1
408	ZINC12523870	N1C(c2c3ccccc3cc4ccccc24)n5c([nH+]c6ccccc56)c7ccccc17
409	ZINC04710539	CC1(C)CC2=C(C(c3ccc4ccc[nH+]c4c3)c5c(N2)ccc6[nH+]cccc56)C(=O)C1
410	ZINC82728900	Nc1c(S)cc(Br)cc1Cl
411	ZINC82728901	Nc1cc(Cl)c(Br)cc1S
412	ZINC16383368	Clc1cc(Cl)c2NC(=S)NC(=O)c2c1
413	ZINC08846658	Cc1ccc2c3C(C4=C(CC(C)(C)CC4=O)Nc3ccc2[nH+]1)c5cccc(Cl)c5Cl
414	ZINC71774239	Clc1ccc2NC(=O)c3ccccc3Nc2c1
415	ZINC75489143	CC1(C)CC2CC(C)(C/[N+]/2=C/3\COc4cc(N)ccc4N3)C1
416	ZINC28950516	Cc1ccc(O)cc1Nc2ccnc(Nc3cccc(c3)C(=O)N)n2
417	ZINC04060567	Oc1ccc(O)c(Br)c1Br
418	ZINC13658815	CC1(O)c2ccccc2c3ccccc3C1(C)O
419	ZINC02166958	Cc1cc(Br)c2C(=O)c3ccccc3C4=C(C(=O)Nc1c24)c5ccccc5
420	ZINC43198944	OC1CCCCC2\C=C/C=C\C(=C/C=2)\CCCCC1O
421	ZINC28950583	Cc1ccc2[nH]ncc2c1Nc3ccnc(Nc4cccc(c4)C(=O)N)n3
422	ZINC04450982	CC1(C)Cc2ccccc2C(=N1)\C=C\3/NC4(CCCCC4)Cc5ccccc35
423	ZINC35982297	CC12CCC(O)CC1=CCC3C2CCC4(C)C3C\C(=C/c5ccccc5F)\C4=O
424	ZINC15861361	CC12CC(NC(=S)N1c3ccccc3F)c4cc(Br)ccc4O2
425	ZINC15861363	Cc1ccc(cc1C)N2C(=S)NC3CC2(C)Oc4ccc(Br)cc34
426	ZINC15861365	Cc1cc(C)cc(c1)N2C(=S)NC3CC2(C)Oc4ccc(Br)cc34
427	ZINC15828545	Cc1cc(ccc1F)N2C(=S)NC3CC2(C)Oc4ccc(Br)cc34
428	ZINC15861367	Cc1ccc(C)c(c1)N2C(=S)NC3CC2(C)Oc4ccc(Br)cc34
429	ZINC35982228	CC12CCC(O)CC1=CCC3C2CCC4(C)C3C\C(=C/c5cccc(F)c5)\C4=O
430	ZINC95635376	Cc1cc(Br)ccc1c2cc3cc(Br)ccc3c(N)n2
431	ZINC05593291	Cc1ccc(cc1Br)\N=C/2\C(=O)Nc3cc(Br)c(C)cc23
432	ZINC04792828	C[NH+]1CCc2c(C1)sc3NC(=S)NC(=S)c23
433	ZINC05748783	CC12CCC(O)CC1=CCC3C2CCC4(C)C3C\C(=C/c5ccc(Cl)cc5)\C4=O
434	ZINC13717171	Fc1ccc(NC(=O)N2c3ccccc3Sc4ccccc24)cc1Cl
435	ZINC24881770	FC(F)(F)c1cccc(NC(=O)N2CCc3nc4ccc(Cl)cc4cc3C2)c1
436	ZINC16449153	Clc1ccccc1\N=C\2/C(=O)Nc3c(Br)cc(Br)cc23
437	ZINC06252722	O=C(NC12CC3CC(CC(C3)C1)C2)N4c5ccccc5Sc6ccccc46
438	ZINC00900337	COc1ccc(cc1)n2c(CNc3ccc(C)c(Cl)c3)nnc2SCC(=O)Nc4cc(ccc4C)[N+](=O)[O-]
439	ZINC20720529	Cc1ccc2NC(=O)C3(CC(=Nc4[nH]ncc34)O)c2c1
440	ZINC01790428	CCOc1ccc(cc1)n2c(SCC(=O)N\N=C\c3cc(Br)c(O)c(OC)c3)nnc2c4ccccc4
441	ZINC12866465	CC12N(CCc3c1[nH]c4ccccc34)C(=O)N(C2=O)c5ccc(Cl)cc5C(F)(F)F
442	ZINC06513419	Oc1cc(O)c2C(=O)c3cc(Cl)ccc3Nc2c1
443	ZINC00641262	CC(=O)Nc1c(Cl)c(Cl)c2c3ccc(Cl)cc3C(=O)c2c1Cl
444	ZINC02701556	OCCNc1nc(Nc2ccccc2O)nc3ccccc13
445	ZINC00673203	CC(Sc1nc2ccccc2[nH]1)C(=O)N\N=C\c3ccc(O)cc3O
446	ZINC31809194	OC1=Nc2n[nH]cc2C3(C1)C(=O)Nc4ccc(F)cc34
447	ZINC20720529	Cc1ccc2NC(=O)C3(CC(=Nc4n[nH]cc34)O)c2c1
448	ZINC31809230	Cc1cccc2c1NC(=O)C23CC(=Nc4n[nH]cc34)O
449	ZINC31811255	OC1=Nc2n[nH]cc2C3(C1)C(=O)Nc4ccc(Cl)cc34
450	ZINC31809981	OC1=Nc2n[nH]cc2C3(C1)C(=O)Nc4c(Cl)cccc34
451	ZINC41863653	Cc1cc(C)c2NC(=O)C3(NC(=O)c4ccccc4N3)c2c1
452	ZINC41863655	Cc1cccc2c1NC(=O)C23NC(=O)c4ccccc4N3
453	ZINC75568266	Fc1ccc2c(NC(=O)C23NC(=O)c4ccccc4N3)c1
454	ZINC71775406	CC1=CC(=NC(=S)N1)NCCNC2=NC(=S)NC(=C2)C
455	ZINC08438491	COc1ccc(\C=N\Nc2nc(Nc3ccccc3)nc(n2)N4CCCCC4)cc1OCc5c(F)cccc5Cl
456	ZINC08438492	COc1ccc(\C=N\Nc2nc(Nc3ccccc3)nc(n2)N4CCCC4)cc1OCc5c(F)cccc5Cl
457	ZINC72170161	OCCNc1cc(c2ccc(O)c(c2)c3oncc3)c4cc[nH]c4n1
458	ZINC83291958	CC12CCC3C(CC(O)C4=CC(O)CCC34C)C1CCC2O
459	ZINC12494057	CC12CCC3C(CC=C4CC(O)CCC34C)C1CC(O)C2O
460	ZINC19015402	NC(=O)NNC(=O)N1c2ccccc2Sc3ccccc13
461	ZINC19015405	NC(=S)NNC(=O)N1c2ccccc2Sc3ccccc13
462	ZINC31809230	Cc1cccc2c1NC(=O)C23CC(=Nc4[nH]ncc34)O
463	ZINC91518736	Cc1cc(NCc2[nH]nc3CCCc23)nc(Nc4cccc(O)c4)n1
464	ZINC91518736	Cc1cc(NCc2n[nH]c3CCCc23)nc(Nc4cccc(O)c4)n1
465	ZINC15202298	NC(=O)N1NC2(CC1(O)C(F)(F)F)C3CC4CC(CC2C4)C3
466	ZINC31809194	OC1=Nc2[nH]ncc2C3(C1)C(=O)Nc4ccc(F)cc34
467	ZINC95519906	CC(C)C(=O)Nc1cc(NC(=O)NC(C)c2nnc(N)s2)ccc1F
468	ZINC20745808	OC1=Nc2n[nH]cc2C3(C1)C(=O)Nc4ccccc34
469	ZINC31810960	OC1=Nc2n[nH]cc2C3(C1)C(=O)Nc4cc(F)ccc34
470	ZINC06933017	CC12CCC3C(C(O)CC4CC(O)CCC34C)C1CC(O)C2
471	ZINC02180582	OCCNc1nc(Nc2cccc(O)c2)nc3ccccc13
472	ZINC07273701	NC(=O)c1cc(ccc1O)c2csc(NNc3ccccc3)n2
473	ZINC08437953	Clc1ccc(cc1)c2nnc(SCC(=O)Nc3ccc4nc(SCC(=O)NC5CC5)sc4c3)n2c6ccccc6
474	ZINC71770053	CC12CCC3C(CC(F)C4(O)CC(O)CCC34C)C1CCC2O
475	ZINC57464059	Cc1ccc2NC(=O)C3(NC(=O)c4ccccc4N3)c2c1
476	ZINC76973919	CN1c2ccc(N)cc2NCC13CC(C)(C)[NH2+]C(C)(C)C3
477	ZINC01826112	COc1ccc(cc1)n2c(SCC(=O)NNC(=C)c3ccc(cc3)[N+](=O)[O-])nnc2c4ccc(cc4)C(C)(C)C
478	ZINC01821925	CCOc1cccc(\C=N\NC(=O)CSc2nnc(c3ccc(cc3)C(C)(C)C)n2c4ccc(OC)cc4)c1O
479	ZINC17004559	CC12CCC(O)CC1CCC3C2CCC4(C)C(O)C(O)CC34
480	ZINC05541879	Cc1ccc(O)c(c1)\C(=N\O)\CC\C(=N/O)\c2cc(O)ccc2C
481	ZINC65001953	O=C1N\C(=C\2/C=[NH+]c3ccccc23)\Nc4sc5CCCCc5c14
482	ZINC72467652	CC1(C)CC(=O)C2=C(C1)Nc3ccccc3NC2=N
483	ZINC06694025	COc1ccc(NC(=O)c2[nH]c[nH+]c2\N=N\c3ccc(O)cc3O)cc1
484	ZINC02846610	OCCNc1nc(Nc2ccc(O)cc2)nc3ccccc13
485	ZINC06511521	COc1ccc(cc1)c2cc(n[nH]2)C(=O)N\N=C(\C)/c3ccc(O)cc3O
486	ZINC31809981	Clc1cccc2c1NC(=O)C23CC(=O)Nc4n[nH]cc34
487	ZINC31811255	Clc1ccc2NC(=O)C3(CC(=O)Nc4n[nH]cc34)c2c1
488	ZINC25758512	Oc1cc2CCC3NCc4ccccc4C3c2cc1O
489	ZINC12355964	Oc1ccc2C3CNCc4cccc(Cc2c1O)c34
490	ZINC03668171	O=C(CSc1nc2ccc(NC(=O)CSc3nnc(c4ccccc4)n3c5ccccc5)cc2s1)NC6CC6
491	ZINC00495214	NN1C(=S)NC2(CCCCC2)C3CCCCC13O
492	ZINC25756944	CC12CC=C3C(CCc4cc(O)ccc34)C1CC(O)C2O
493	ZINC00695700	COc1ccccc1NCc2nnc(SCC(=O)N\N=C\c3occc3)n2c4ccc(Cl)cc4Cl
494	ZINC22124717	NC(=S)NNc1nc2c(Cl)c(Cl)c(SCCO)cc2s1
495	ZINC04824306	Nc1ccc2c(c1)C(O)c3cc(N)c(Br)cc23
496	ZINC65743209	CC(=O)Nc1ccc(O)c(SSc2cc(NC(=O)C)ccc2O)c1
497	ZINC00917372	COc1ccc(cc1)n2c(CNc3ccccc3Cl)nnc2SCC(=O)Nc4cc(ccc4C)[N+](=O)[O-]
498	ZINC01876218	CCOc1cc(\C=N\NC(=O)CSc2nnc(c3ccc(cc3)C(C)(C)C)n2c4ccc(OC)cc4)ccc1O
499	ZINC12487558	Nc1nc(SCC(=O)NNc2c(Cl)cc(Cl)cc2Cl)n[nH]1
500	ZINC00870548	COc1ccc(cc1)n2c(CNc3ccc(C)cc3)nnc2SCC(=O)Nc4nc(cs4)c5ccccc5
501	ZINC00925422	COc1ccc(NCc2nnc(SCC(=O)Nc3ccc(C)c(c3)[N+](=O)[O-])n2c4cccc(Cl)c4)cc1
502	ZINC01758660	Cn1c(SCC(=O)Nc2ccc3nc(SCC(=O)NCc4ccccc4)sc3c2)nnc1c5ccccc5
503	ZINC17027770	S=C1NN=C(NNc2ccccc2)N1Nc3ccccc3
504	ZINC06511521	COc1ccc(cc1)c2cc([nH]n2)C(=O)N\N=C(\C)/c3ccc(O)cc3O
505	ZINC01409698	CC(CCc1ccccc1)NC(=O)c2nnn3c2Sc4c(nnn4c5ccccc35)C(=O)NC(C)CCc6ccccc6
506	ZINC04470865	CC(Sc1nc2ccccc2[nH]1)C(=O)N\N=C/c3ccc(O)cc3O
507	ZINC01901296	CC(C)c1ccc(NC(=O)CSc2nc3ccc(NC(=O)CSc4nnc(c5ccccc5)n4C)cc3s2)cc1
508	ZINC00650409	COC(=O)c1ccccc1NC(=O)CSc2nnc(CNc3ccc(OC)cc3)n2c4cccc(Cl)c4
509	ZINC00877722	COc1ccc(NCc2nnc(SCC(=O)Nc3nc(cs3)c4ccccc4)n2c5ccccc5)cc1

## Sheet: Active GPER-1_Selctive
		Active GPER-1_Selctive
Compound No.	Compound Code	SMILES
1	G1	CC(=O)c1ccc2N[C@H]([C@H]3CC=C[C@H]3c2c1)c4cc5OCOc5cc4Br
2	G15	Brc1cc2OCOc2cc1[C@@H]3Nc4ccccc4[C@@H]5C=CC[C@H]35
3	G36	CC(C)c1ccc2N[C@H]([C@H]3CC=C[C@H]3c2c1)c4cc5OCOc5cc4Br

## Sheet: Decoys GPER-1_Selctive
		Decoys GPER-1_Selctive
Compound No.	Compound Code	SMILES
1	ZINC01458018	Oc1[nH]c2c(Br)cc(Br)cc2c1\N=N\C(=O)c3occc3
2	ZINC20227359	Clc1ccc(NC2=NC(=O)\C(=C/c3oc(Br)cc3)\S2)cc1
3	ZINC03375314	FC(F)(F)c1cccc(NC2=NC(=O)\C(=C/c3cccc(c3)C(F)(F)F)\S2)c1
4	ZINC02914798	Fc1ccc(Br)cc1C2CC(N=C3N=CNN23)c4cccc(Br)c4
5	ZINC18255977	OC1=C\C(=N/c2ccc(F)c(c2)C(F)(F)F)\c3ccccc3C1=O
6	ZINC00633995	Clc1ccc(cc1)C2CC(N3NC=NC3=N2)c4ccc(Br)cc4
7	ZINC16282075	Cc1cc(I)ccc1\N=C\2/C=C(O)C(=O)c3ccccc23
8	ZINC77303389	CC1(CCC2C3CCC4Cc5n[nH]cc5CC4(C)C3CCC12C)OC6CCCCO6
9	ZINC36729292	Clc1ccc(C2=NNC(=S)N2c3ccc(Br)cc3)c(Cl)c1
10	ZINC35313066	CC(C)c1ccc2nc3sc(C(=O)N4CCc5ccccc45)c(N)c3cc2c1
11	ZINC84593437	FC(F)(F)c1cc(nc2NC(=O)c3ccccc3c12)c4ccncc4
12	ZINC33042874	CCC1N(Cc2c3CCCCc3sc2n4cccc14)C(=O)Nc5cc(Cl)ccc5C
13	ZINC58061597	Cc1ccc(NC(=O)N2CCC(CC2)c3oc4ccc(Cl)cc4n3)c(Br)c1
14	ZINC13132456	CC1(CCC(=O)O1)C2CCC3C4CC=C5CC(O)CCC5(C)C4CCC23C
15	ZINC35399284	Cc1ccc2c(NC3(CCN(CC3)S(=O)(=O)c4cccc(Cl)c4)c5cccn25)c1
16	ZINC12550498	O=C1N(Cc2ccccc2)c3ccccc3C14Nc5ccccc5c6nc7ccccc7n46
17	ZINC20863796	Fc1ccc(NC(=O)N2Cc3ccccc3Sc4ncccc24)cc1
18	ZINC05445989	CC12CC3(C)CC(C)(C1)CC(C3)(C2)C(=O)Nc4ccc5C(=O)c6ccccc6C(=O)c5c4
19	ZINC05175618	CCC(=O)N1C(C2=C(CC(C)(C)CC2=O)Nc3ccccc13)c4ccc(cc4)C#N
20	ZINC35399286	Cc1ccc2c(NC3(CCN(CC3)S(=O)(=O)c4ccccc4Cl)c5cccn25)c1
21	ZINC01030910	CC1=C(C#N)C(C2=C(CCCC2=O)N1)c3ccc(cc3Cl)C(F)(F)F
22	ZINC00727239	CCOC(=O)NC1(Oc2cc(Cl)c(Cl)cc2O1)C(Cl)(Cl)Cl
23	ZINC15835467	Cc1c(oc2cc(Br)ccc12)C(=O)Nc3cccc4cccnc34
24	ZINC19594842	Nc1nc2CCCCCCc2c(c3ccc(Cl)cc3Cl)c1C#N
25	ZINC01157895	Clc1cc(Cl)c2OC(=O)C(=Cc2c1)C(=O)Nc3ccc4ccccc4c3
26	ZINC12504523	CC(=O)C1(O)CCC2C3C=C(Cl)C4=CC(=O)C5CC5C4(C)C3CCC12C
27	ZINC00650801	Cc1ccc(cc1C)c2cc(n3nc(cc3n2)C(=O)NC(C)(C)C)C(F)(F)F
28	ZINC33042898	CCC1N(Cc2c3CCCCc3sc2n4cccc14)C(=O)Nc5ccc(C)cc5C
29	ZINC41352905	FC(F)(F)C1=CC(=O)c2cc(NC(=O)c3oc4ccccc4c3)ccc2O1
30	ZINC19074419	FC(F)(F)c1cc(cc(c1)C(F)(F)F)C(=O)Nc2nc3c(ccc4ccccc34)s2
31	ZINC35399295	Cc1cc(C)c(c(C)c1)S(=O)(=O)N2CCC3(CC2)Nc4cc(F)ccc4n5cccc35
32	ZINC06276468	Nc1c(sc2nc3CCCCCCc3cc12)C(=O)c4ccc(Cl)cc4Cl
33	ZINC12496565	CN(C)c1ccc(\C=C\2/CC3C4CC=C5CC(O)CCC5(C)C4CCC3(C)C2=O)cc1
34	ZINC33042905	CCC1N(Cc2c3CCCCc3sc2n4cccc14)C(=O)Nc5cccc6CCCCc56
35	ZINC04697724	CC(C)(C)NC(=O)c1ccc2nc3c4ccccc4c5ccccc5c3nc2c1
36	ZINC35399302	Fc1ccc2c(NC3(CCN(CC3)S(=O)(=O)c4ccc5ccccc5c4)c6cccn26)c1
37	ZINC33042909	CCC1N(Cc2c3CCCCc3sc2n4cccc14)C(=O)Nc5ccc(F)cc5
38	ZINC04697728	Cc1ccc(NC(=O)c2ccc3nc4c5ccccc5c6ccccc6c4nc3c2)cc1
39	ZINC33042913	CCC1N(Cc2c3CCCCc3sc2n4cccc14)C(=O)Nc5ccc(C)c(F)c5
40	ZINC06738781	Oc1cccc2ccc(nc12)C3SCC(=O)N3c4ccc(F)c(Cl)c4
41	ZINC33042916	CCC1N(Cc2c3CCCCc3sc2n4cccc14)C(=O)Nc5cc(F)ccc5F
42	ZINC35399310	Cc1ccc(C)c(c1)S(=O)(=O)N2CCC3(CC2)Nc4cc(F)ccc4n5cccc35
43	ZINC00570201	Nc1c(Cl)cc2oc(nc2c1Cl)c3ccc(Cl)cc3Cl
44	ZINC19832200	CC1=C(C#N)C(C2=C(CCCC2=O)N1)c3ccccc3C(F)(F)F
45	ZINC09322162	Cc1ccc(cc1)N2C(=S)NC(=O)\C(=C/c3c4ccccc4cc5ccccc35)\C2=O
46	ZINC33042923	CCC1N(Cc2c3CCCCc3sc2n4cccc14)C(=O)Nc5ccc(F)cc5F
47	ZINC35399317	Cc1ccc(c(C)c1)S(=O)(=O)N2CCC3(CC2)Nc4cc(F)ccc4n5cccc35
48	ZINC01335349	FC(F)(F)c1cc(Cl)ccc1NC(=O)N2CCC(CC2)c3nc4ccccc4s3
49	ZINC35399318	Cc1ccc(cc1C)S(=O)(=O)N2CCC3(CC2)Nc4cc(F)ccc4n5cccc35
50	ZINC04728331	COC(=O)C1=C(C)NC2=C(C1c3cccc(Cl)c3Cl)C(=O)CC(C)(C)C2
51	ZINC58514064	Cc1cc(NC(=O)N2CCc3ccc(Cl)cc23)n(n1)C(C)(C)C
52	ZINC08684772	CC1CC2=C(C(Sc3ccccc3N2)c4ccc(F)cc4)C(=O)C1
53	ZINC02727674	Cc1ccc(NC(=S)N2CCSC2c3ccc(Br)s3)cc1
54	ZINC68739421	CC1=[N+]2C(=NC(=O)\C(=C\c3cc(C)n(c3C)c4ccc(Cl)cc4)\C2=N)SC1
55	ZINC00570200	Nc1c(Cl)cc2oc(nc2c1Cl)c3cc(Cl)ccc3Cl
56	ZINC01023654	Clc1ccc2nc(sc2c1)N3CCCN(CC3)C(=S)Nc4ccccc4
57	ZINC05562048	CC(=O)OC1CCC2(C)C3CCC4(C)C(CCC4\C(=N/O)\C)C3CC=C2C1
58	ZINC01393326	FC(F)(F)c1cnc2c(nn(C(=O)Nc3ccc(Cl)cc3)c2c1)c4ccccc4
59	ZINC08821938	Cn1cc(\C=C\2/SC(=NC2=O)NC(=O)c3ccccc3Br)c4ccccc14
60	ZINC00570167	Nc1c(Cl)cc2oc(nc2c1Cl)c3ccc(F)cc3Cl
61	ZINC08828418	CC1C=C(\C=C\2/SC(=NC2=O)Nc3ccc(Cl)cc3C(F)(F)F)c4ccccc14
62	ZINC33042952	CCc1ccc(NC(=O)N2Cc3c4CCCCc4sc3n5cccc5C2C)cc1
63	ZINC17056747	CC1(C)Cc2ccccc2C3=C1C(=O)N(C(=S)N3)c4ccccc4
64	ZINC01955825	Oc1c(Br)cc(Br)cc1\C=N\c2sc3CCCCc3c2C#N
65	ZINC05898322	Cc1cccc(NC(=O)N2c3ccccc3Sc4ccccc24)n1
66	ZINC04827330	Clc1c(Cl)c(NC2CCCCC2)c3C(=O)c4ccccc4C(=O)c3c1Cl
67	ZINC00858071	Oc1c(Cl)cc(Br)cc1\C=N\c2sc3CCCCc3c2C#N
68	ZINC03018571	COC(=O)C1=C(C)NC2=C(C1c3ccccc3C(F)(F)F)C(=O)CC(C)(C)C2
69	ZINC02447466	FC(F)(F)c1cc(ccc1Cl)N2C(=S)S\C(=C/c3c[nH]c4ccccc34)\C2=O
70	ZINC16283531	Cc1cc(C)nc(N\C(=N\C(=O)C(C)(C)C)\[N-]c2cccc(c2)C(F)(F)F)n1
71	ZINC06471815	O\N=C\1/C=C\C(=C(\C#N)/c2ccc(Cl)cc2)\C=C1Br
72	ZINC39379208	CC1CCCC(C)N1C(=O)c2ccc(cc2)\N=C\3/C=C(O)C(=O)c4ccccc34
73	ZINC80350099	FC(F)(F)c1cccc(c1)\N=C/2\C(\SC(N2)=O)=C/c3ccc(Cl)cc3
74	ZINC02451885	OC(=C1C(OC(=O)C1=O)c2ccc(Br)cc2)c3ccc(Cl)cc3
75	ZINC83308397	Cc1cc(C)cc(c1)N2C(=O)NC(=O)\C(=C/c3c4ccccc4cc5ccccc35)\C2=O
76	ZINC01953633	[O-]c1c(Cl)cc(Br)cc1\C=C\2/S\C(=N/c3ccccc3Cl)\NC2=O
77	ZINC01502364	[O-]c1c(Cl)cc(Cl)cc1\C=C\2/S\C(=N/c3ccccc3Cl)\NC2=O
78	ZINC01885895	[O-]c1c(Br)cc(Cl)cc1\C=C\2/S\C(=N/c3ccccc3Cl)\NC2=O
79	ZINC39379208	CC1CCCC(C)N1C(=O)c2ccc(cc2)\N=C/3\C=C(O)C(=O)c4ccccc34
80	ZINC83308479	Cc1cc(C)cc(c1)\N=C/2\NC(=O)\C(=C/c3cc(Cl)cc(Br)c3[O-])\S2
81	ZINC83308479	Cc1cc(C)cc(c1)\N=C\2/NC(=O)\C(=C/c3cc(Cl)cc(Br)c3[O-])\S2
82	ZINC05332178	Oc1c(Br)cc(Br)cc1c2nc3ccccc3s2
83	ZINC13466864	CC12CCC3C(CCC4=CC(=O)C(CC34C)C(=O)C(F)(F)F)C1CCC2O
84	ZINC33042984	CC1N(Cc2c3CCCCc3sc2n4cccc14)C(=O)Nc5ccccc5C
85	ZINC08702036	COC(=O)c1ccc(cc1)C2Nc3c(Br)cccc3C4C5CCC(C5)C24
86	ZINC34776516	COC(=O)c1ccc(cc1)C2Nc3c(Cl)cc(Cl)cc3C4C5CCC(C5)C24
87	ZINC06110395	Clc1ccccc1NC2=NC(=O)\C(=C/c3ccc(Br)cc3)\S2
88	ZINC34776530	COC(=O)c1ccc(cc1)C2Nc3c(Cl)ccc(Cl)c3C4C5CCC(C5)C24
89	ZINC04074104	CC12CCC(O)CC1CCC3C2CCC4(C)C3=CC=C4C5=CC(=O)OC5
90	ZINC04708160	Clc1ccccc1C2Sc3ccccc3NC4=C2C(=O)CC(C4)c5ccccc5
91	ZINC01268468	CC1CCc2c(C1)sc(NC(=O)c3cccc4c(Cl)cccc34)c2C#N
92	ZINC33043016	CC1N(Cc2c3CCCCc3sc2n4cccc14)C(=O)Nc5ccc(F)cc5
93	ZINC33043019	CC1N(Cc2c3CCCCc3sc2n4cccc14)C(=O)Nc5ccc(C)c(F)c5
94	ZINC04163536	CC(C)(C)c1ccc(cc1)C(=O)N2N=C3CCCCC3C2(O)C(F)(F)F
95	ZINC01035315	Cc1ccc(NC(=O)N2CCCN(CC2)C(=O)OC(C)(C)C)cc1Cl
96	ZINC06496533	ClC(Cl)(Cl)C(=O)Nc1cccc(c1)c2oc3ccc4ccccc4c3n2
97	ZINC20355249	Cc1ccc(\C=C/2\Sc3ccc(cc3NC2=O)C(=O)N4CCc5ccccc5C4)cc1
98	ZINC33043029	CC1N(Cc2c3CCCCc3sc2n4cccc14)C(=O)Nc5ccccc5F
99	ZINC34776564	COC(=O)c1ccc(cc1)C2Nc3c(Cl)c(Cl)ccc3C4C5CCC(C5)C24
100	ZINC35399386	Clc1ccc(cc1)C(=O)N2CCC3(CC2)Nc4ccccc4n5cccc35
101	ZINC01143861	Oc1c(Cl)cc(C=C2C(=O)c3ccccc3C2=O)cc1Br
102	ZINC35399390	Clc1cccc(c1)C(=O)N2CCC3(CC2)Nc4ccccc4n5cccc35
103	ZINC35399396	Fc1ccccc1C(=O)N2CCC3(CC2)Nc4ccccc4n5cccc35
104	ZINC33043064	CC(C)NC(=O)N1Cc2c3CCCCc3sc2n4cccc4C1C
105	ZINC00570203	Nc1c(Cl)cc2oc(nc2c1Cl)c3ccc(Cl)c(Cl)c3
106	ZINC35399403	Cc1ccccc1C(=O)N2CCC3(CC2)Nc4ccccc4n5cccc35
107	ZINC35399404	Cc1cccc(c1)C(=O)N2CCC3(CC2)Nc4ccccc4n5cccc35
108	ZINC35399405	Cc1ccc(cc1)C(=O)N2CCC3(CC2)Nc4ccccc4n5cccc35
